# Supplementary material for: First stereoselective total synthesis of cryptomoscatone E1 and synthesis of (+)-goniothalamin via an asymmetric acetate aldol reaction
Source: Royal Society of Chemistry journal article supplement (doi:10.1039/c3ra23167d), 2013-01-01

## Supporting Information

### **First stereoselective total synthesis of cryptomoscatone E1 and synthesis of (+)-goniothalamine *via* an asymmetric acetate aldol reaction**

Jhillu Singh Yadav,<sup>\*</sup> Dinesh Chandra Bhunia, Bogonda Ganganna and Vinay Kumar Singh

*Natural Products Chemistry Division, CSIR-Indian Institute of Chemical Technology, Hyderabad 500 607, India. E-mail: [yadavpub@iict.res.in](mailto:yadavpub@iict.res.in); Fax: +91-40-27160512*

<sup>1</sup>H NMR and <sup>13</sup>C NMR Spectra of All New Compounds

2 – 27

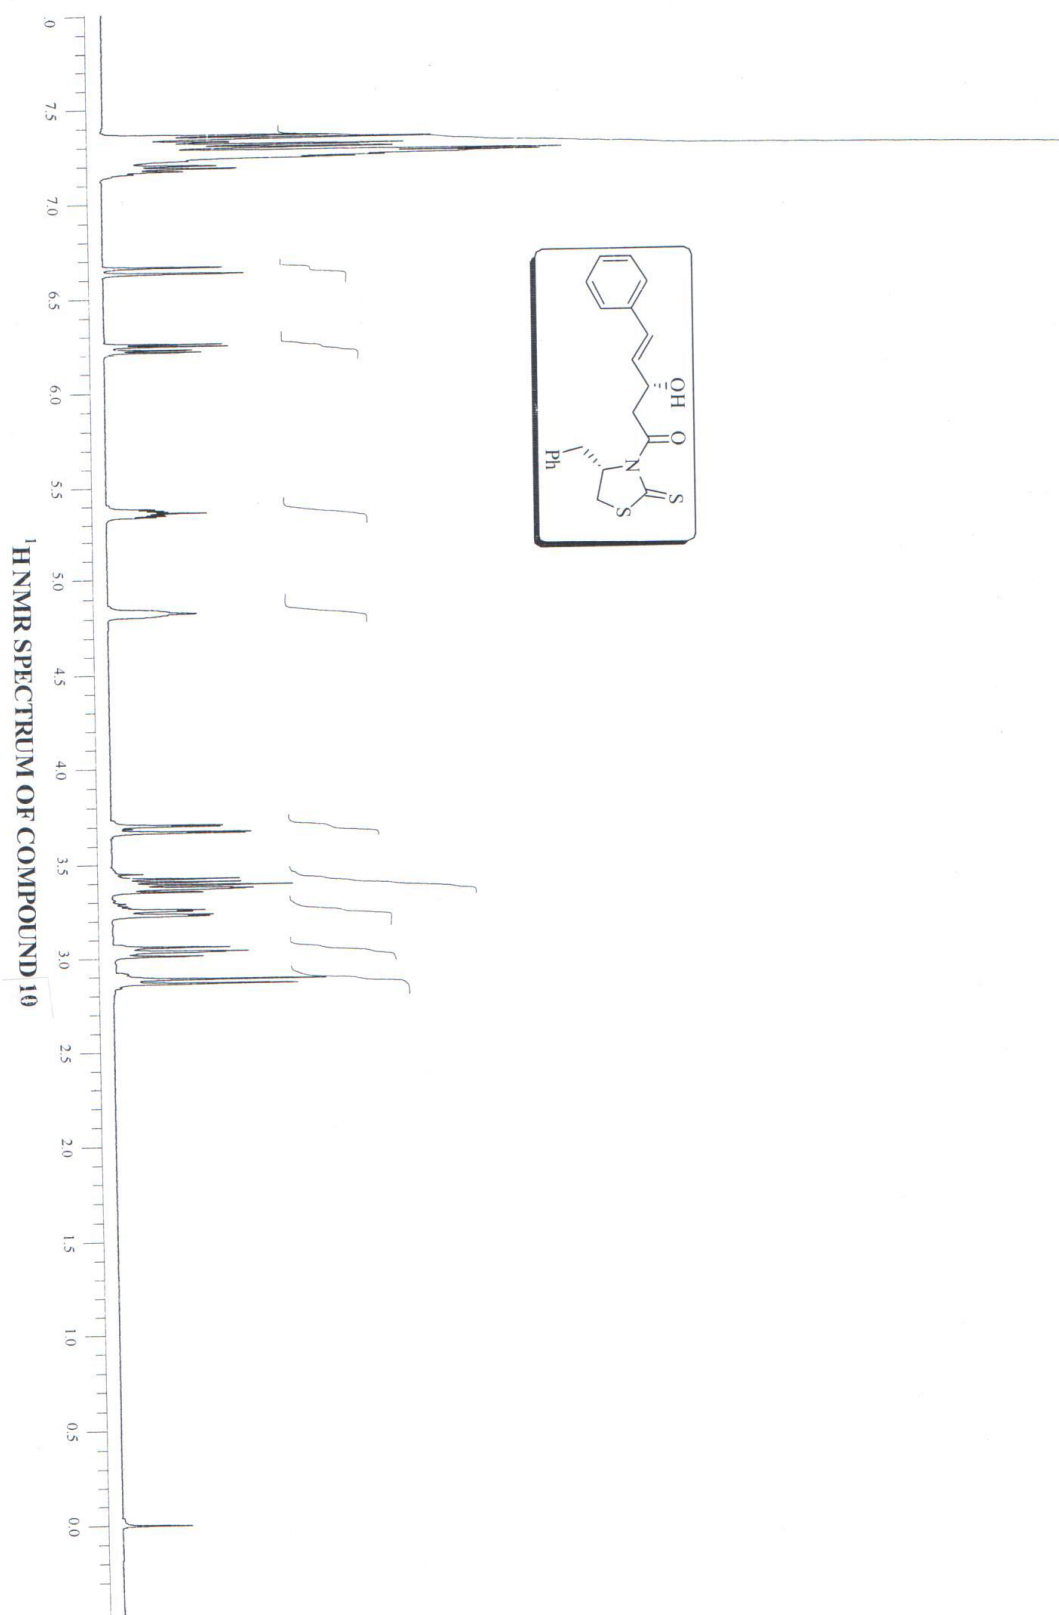

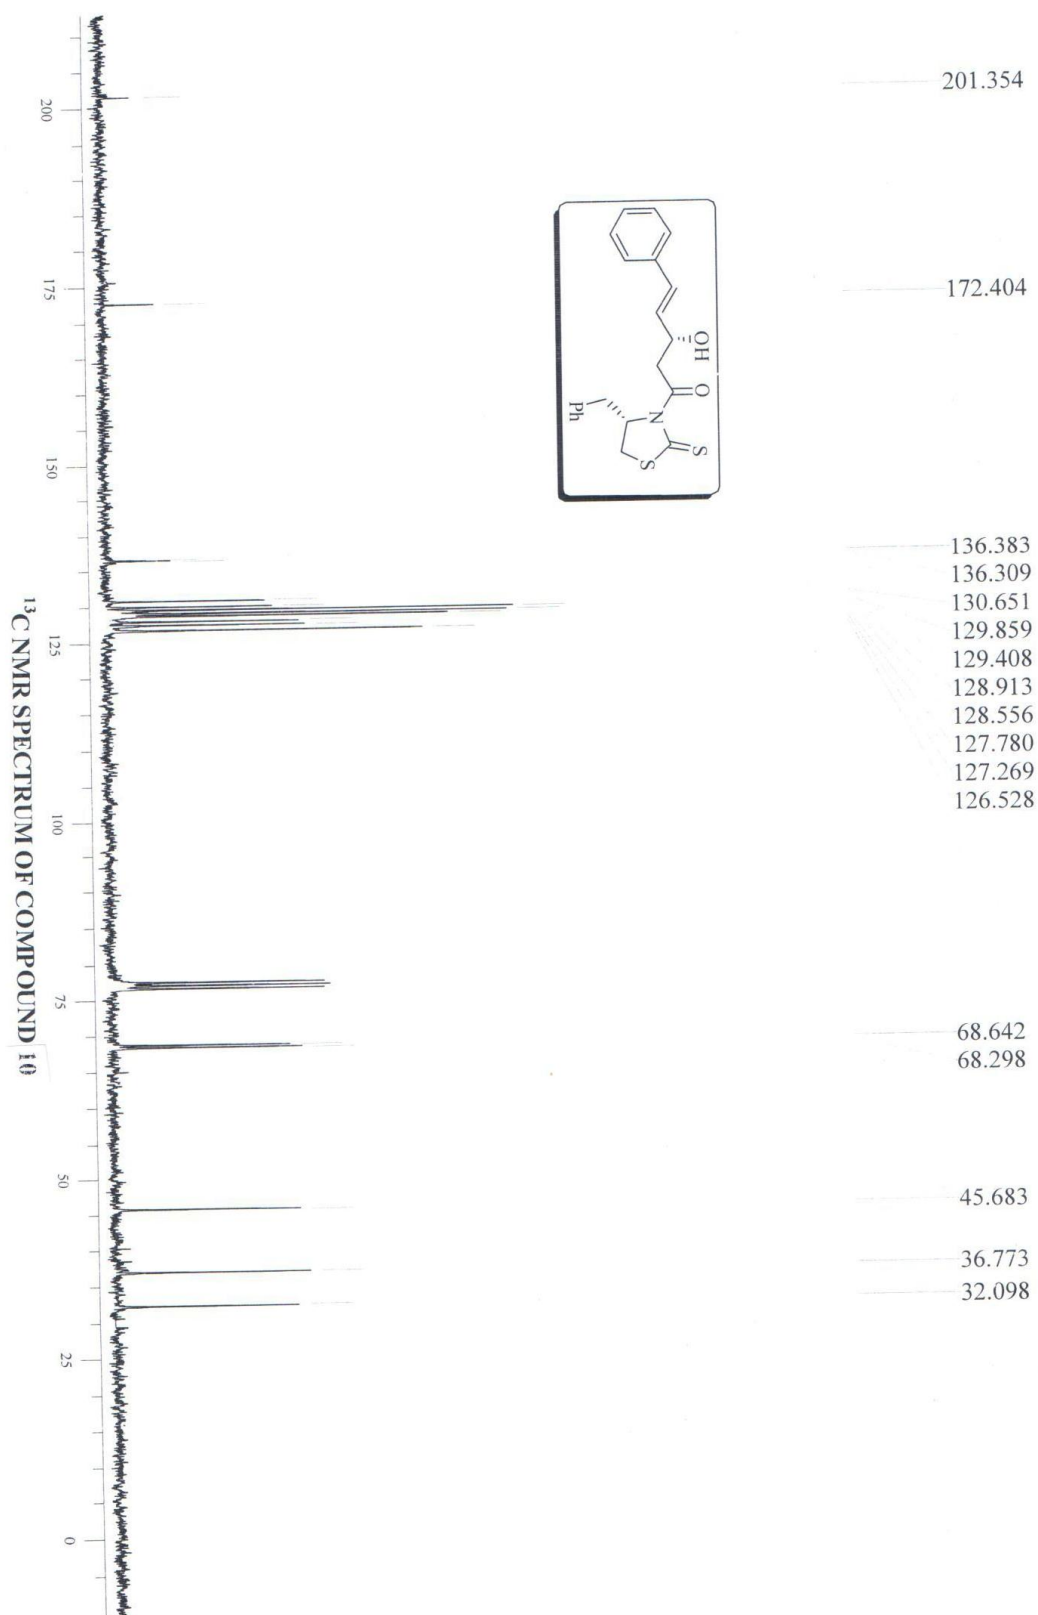

# <sup>1</sup>H NMR SPECTRUM OF COMPOUND 10a

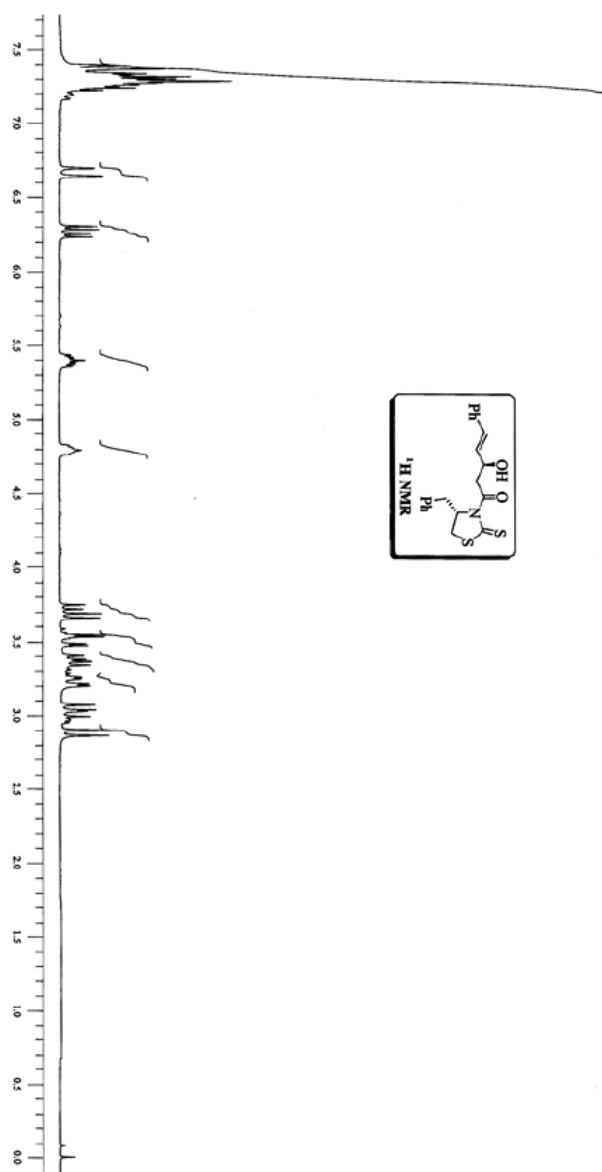

# <sup>13</sup>C NMR SPECTRUM OF COMPOUND 10a

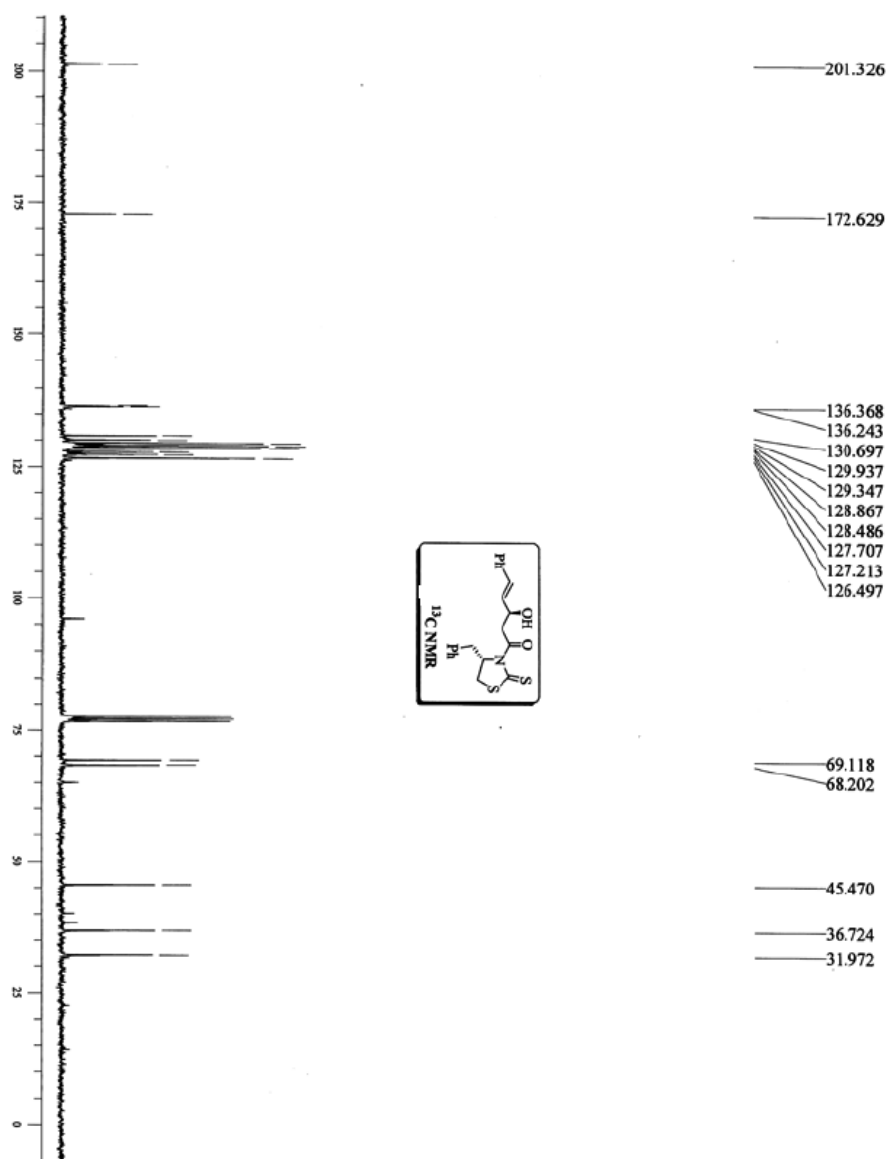

# <sup>13</sup>C NMR SPECTRUM OF COMPOUND 10a

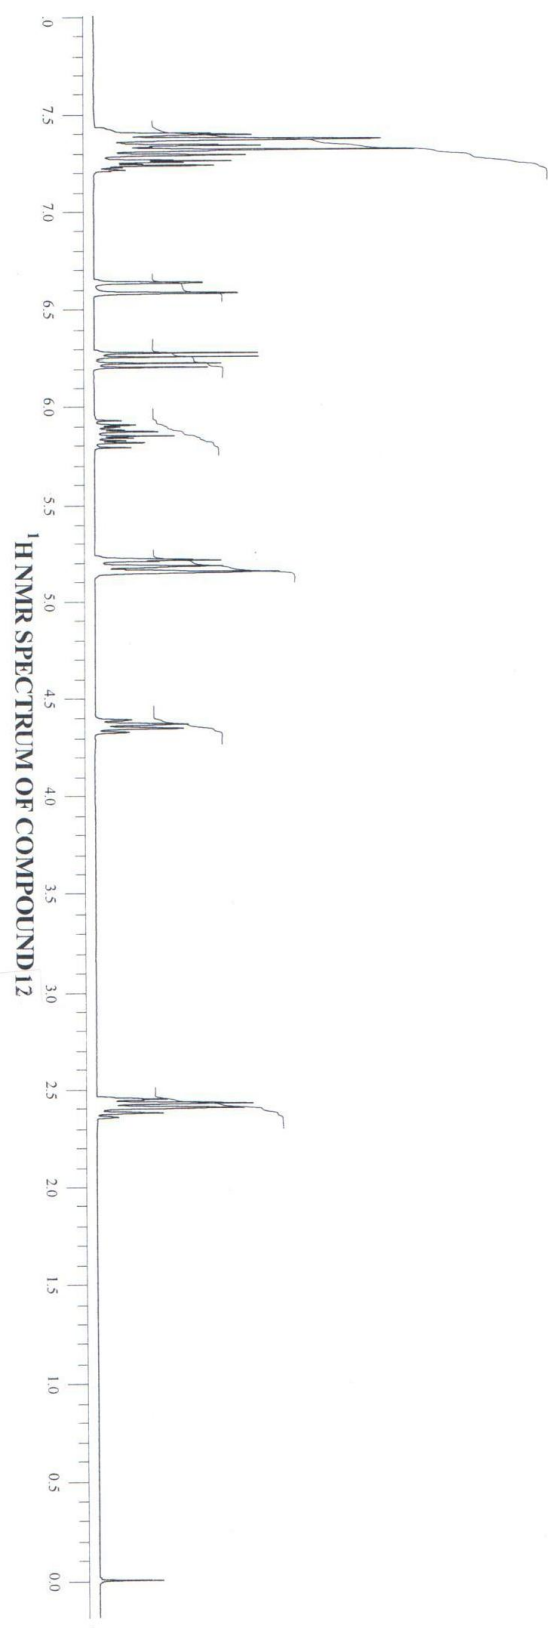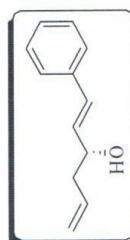

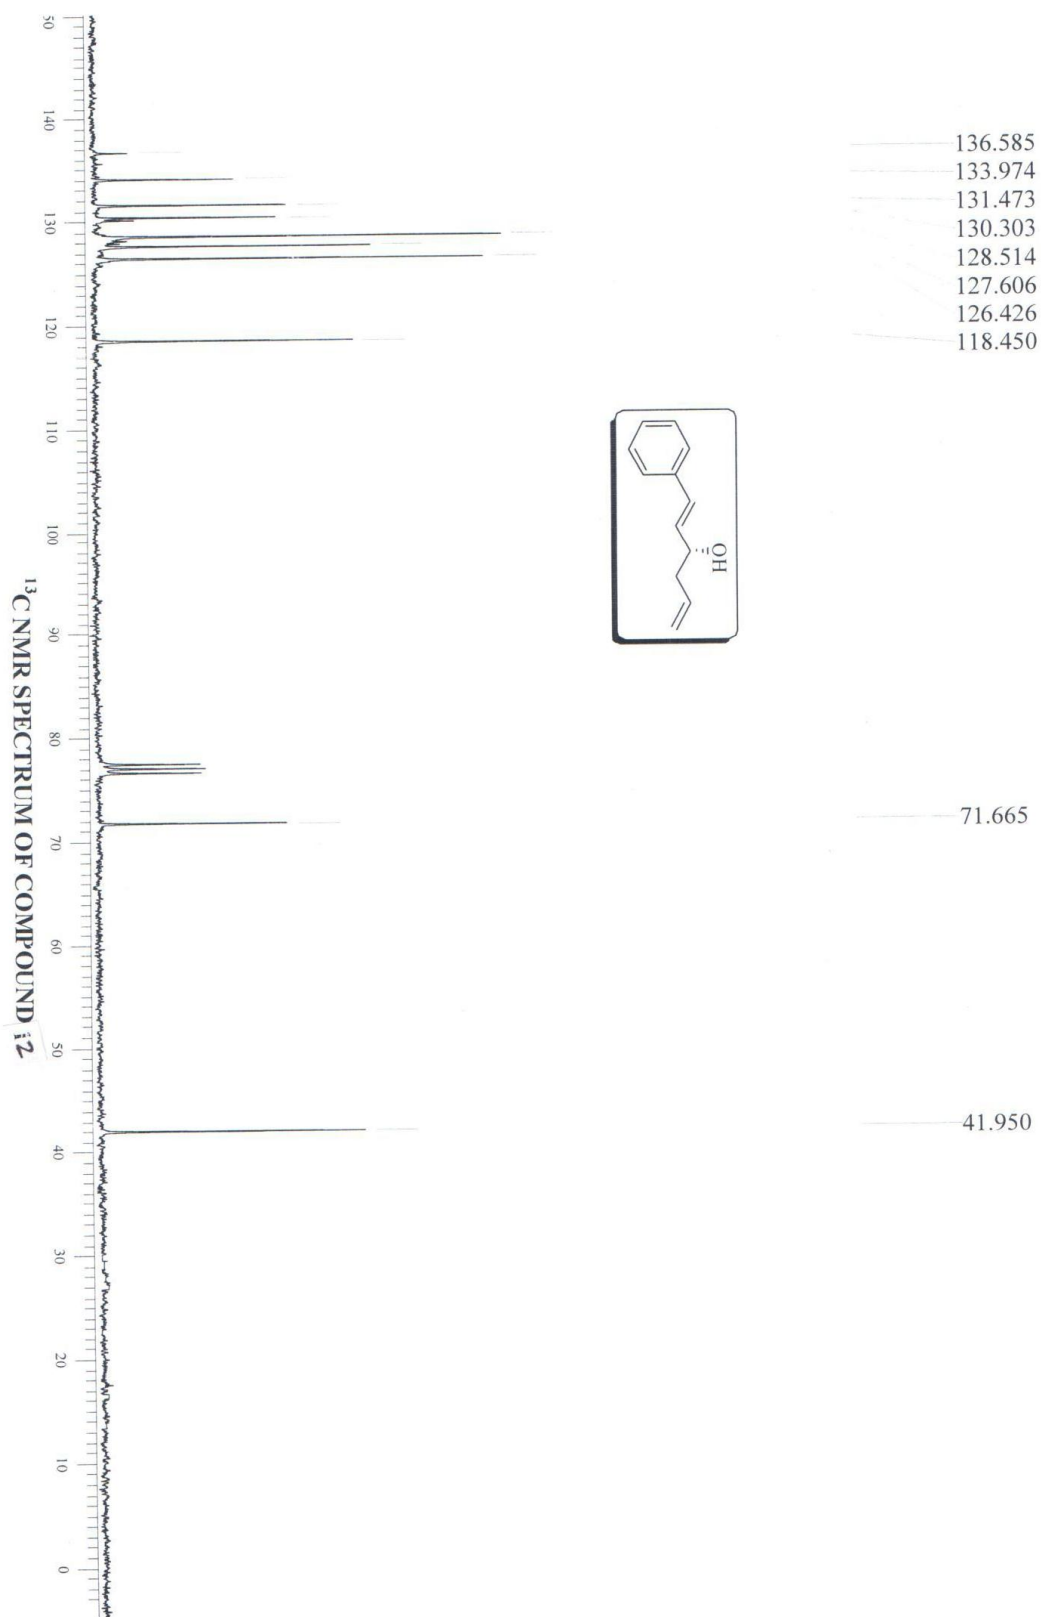

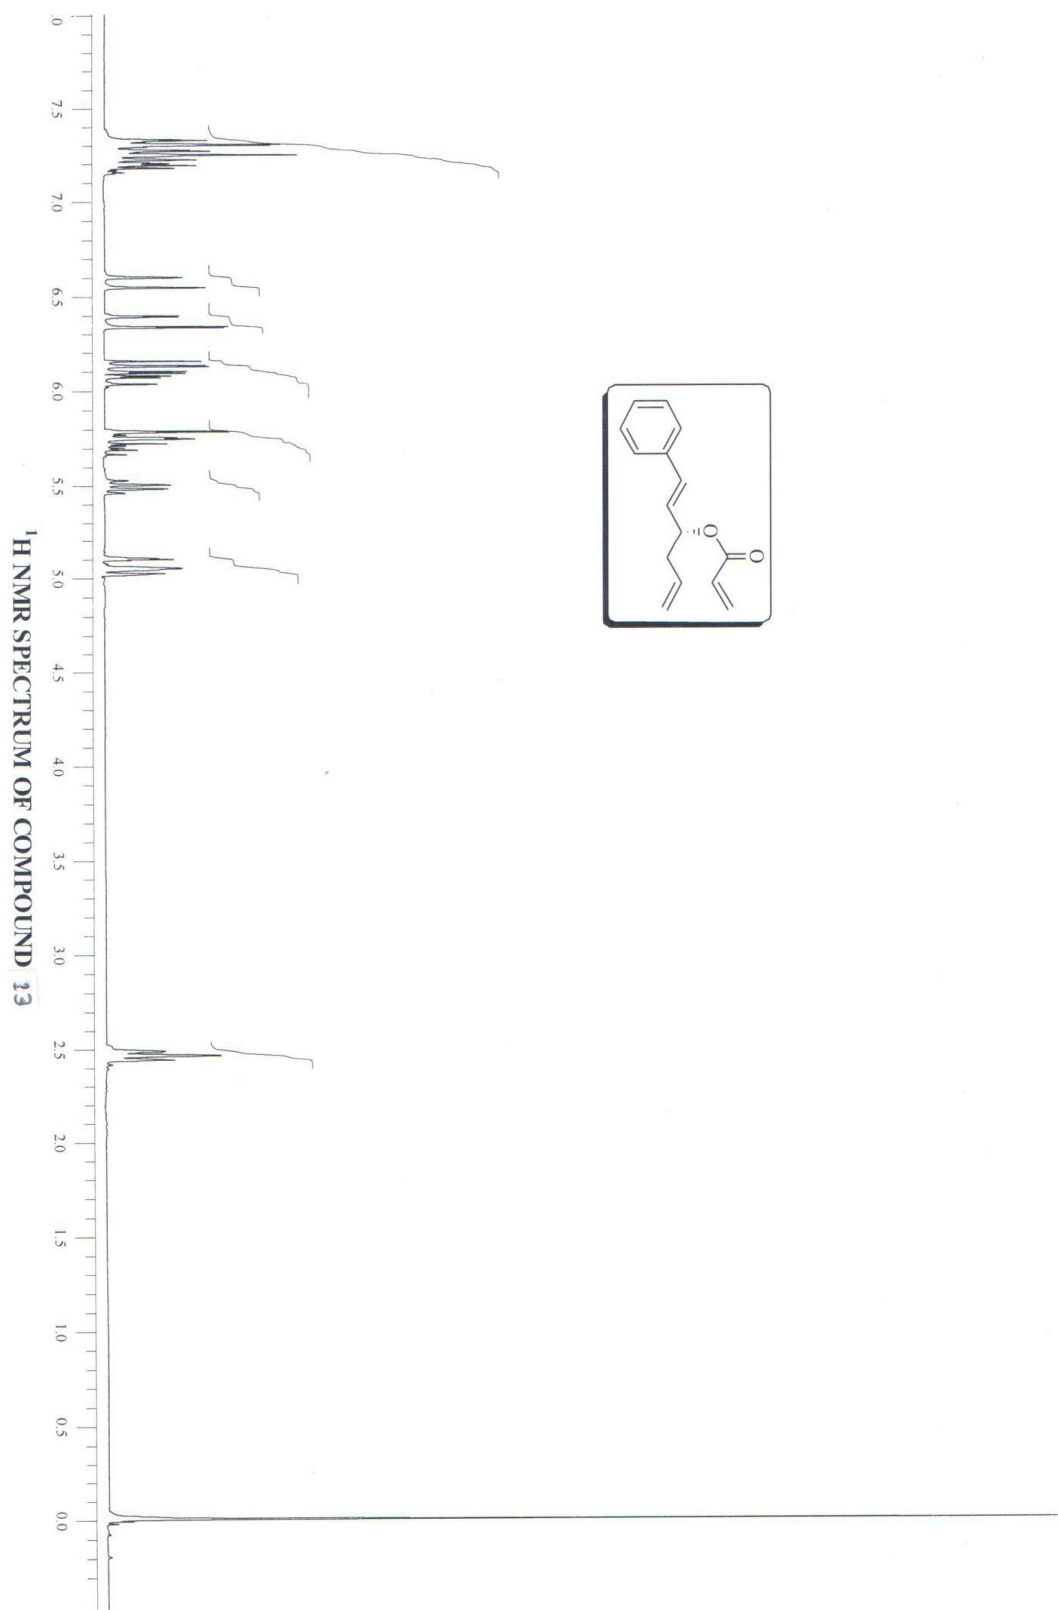

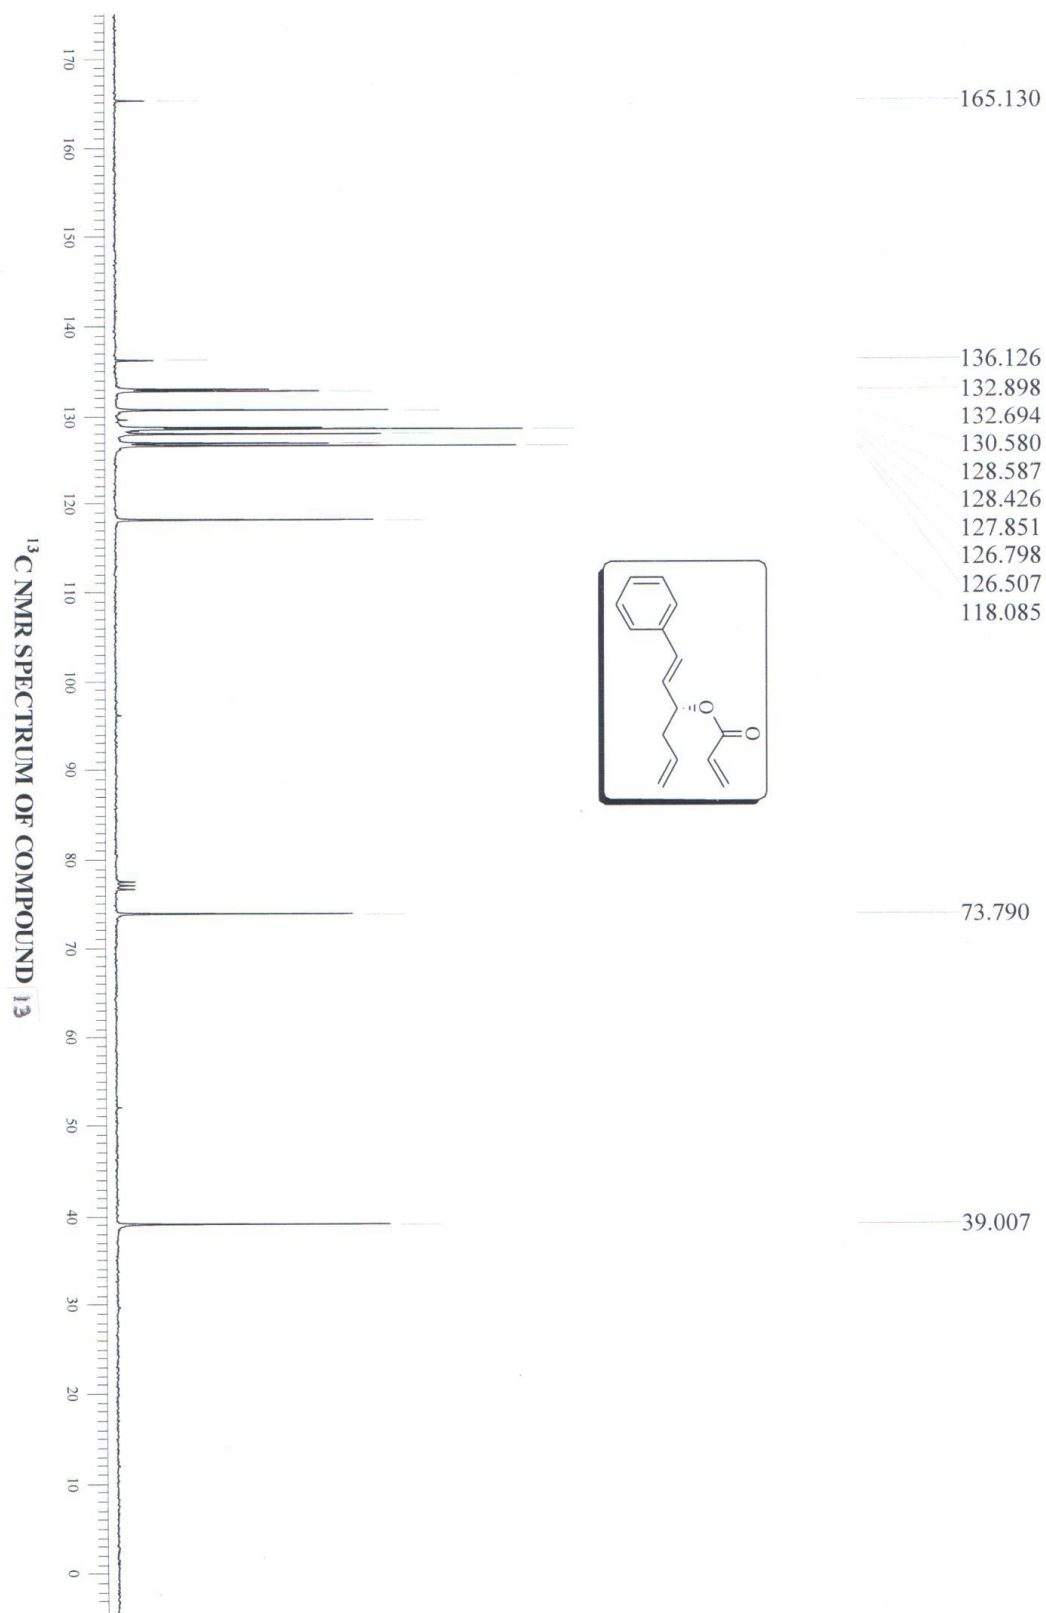

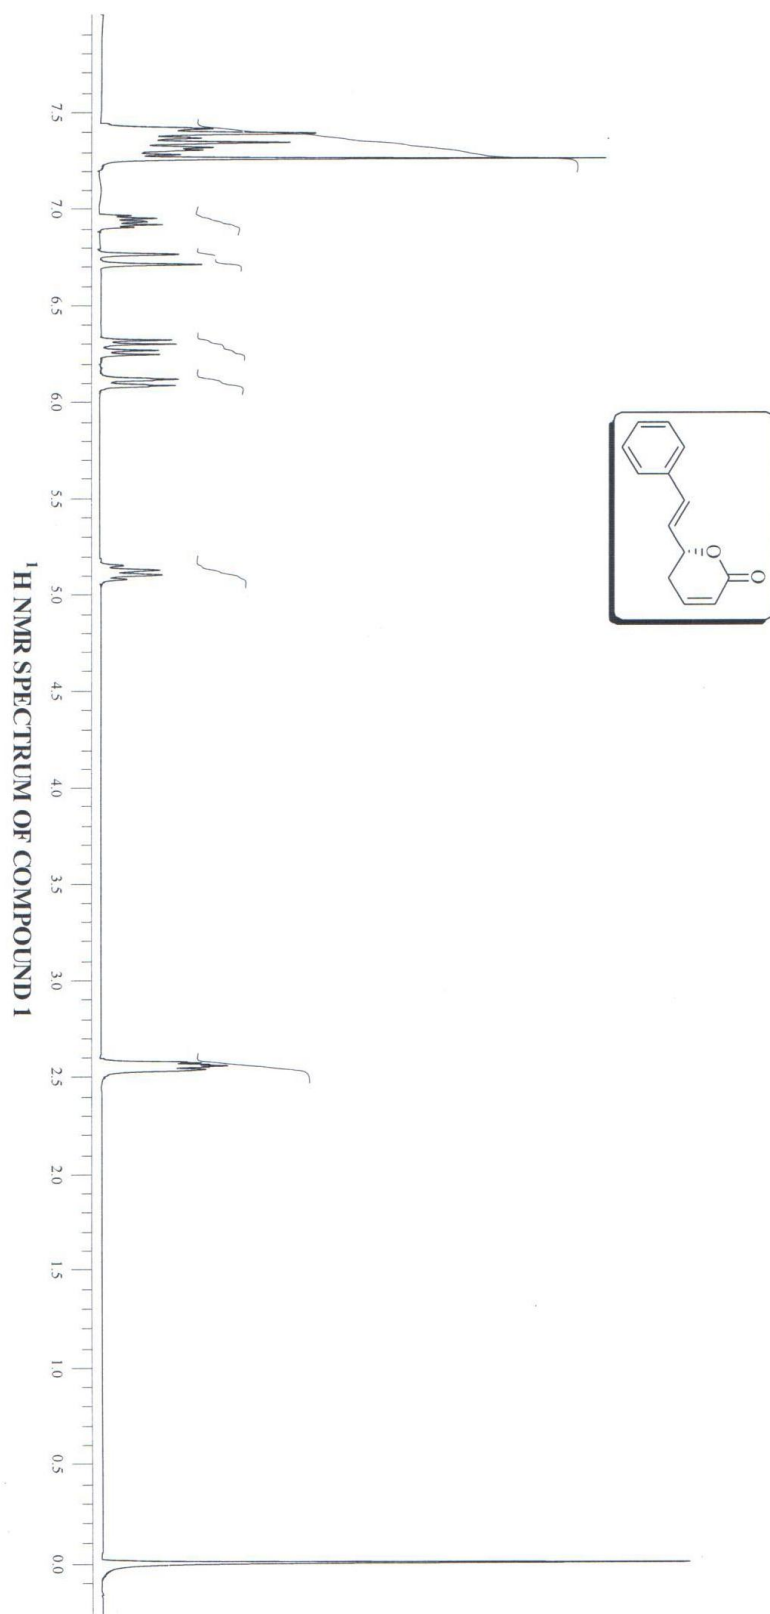

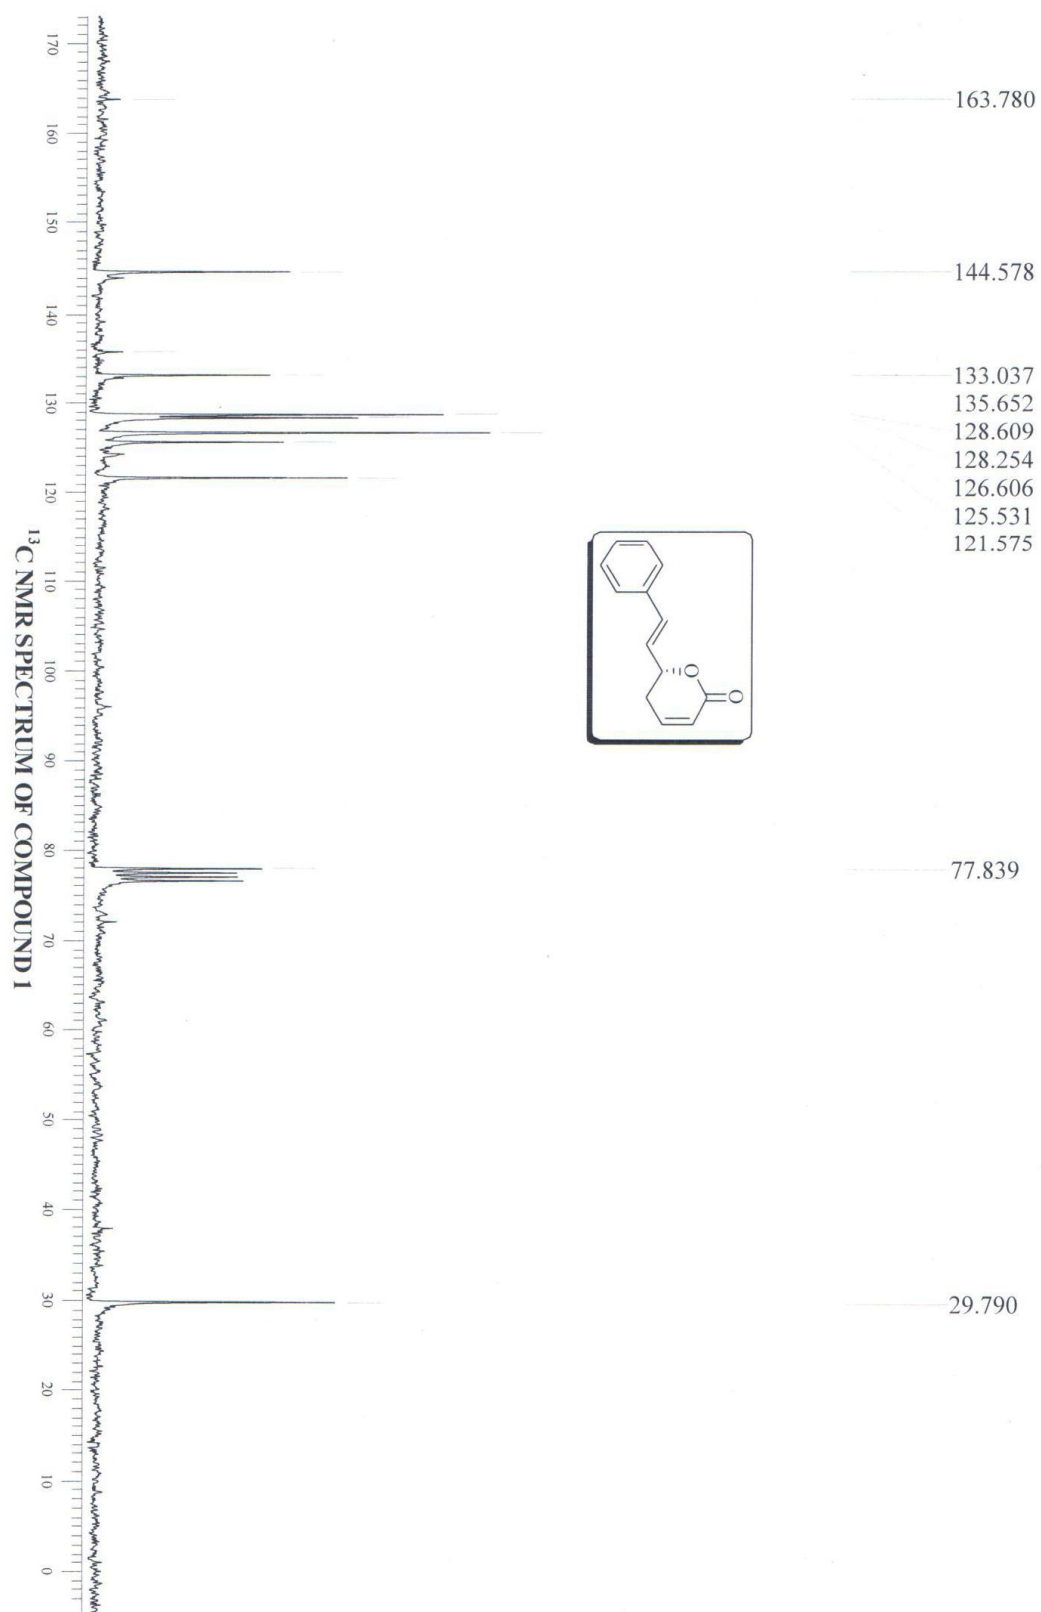

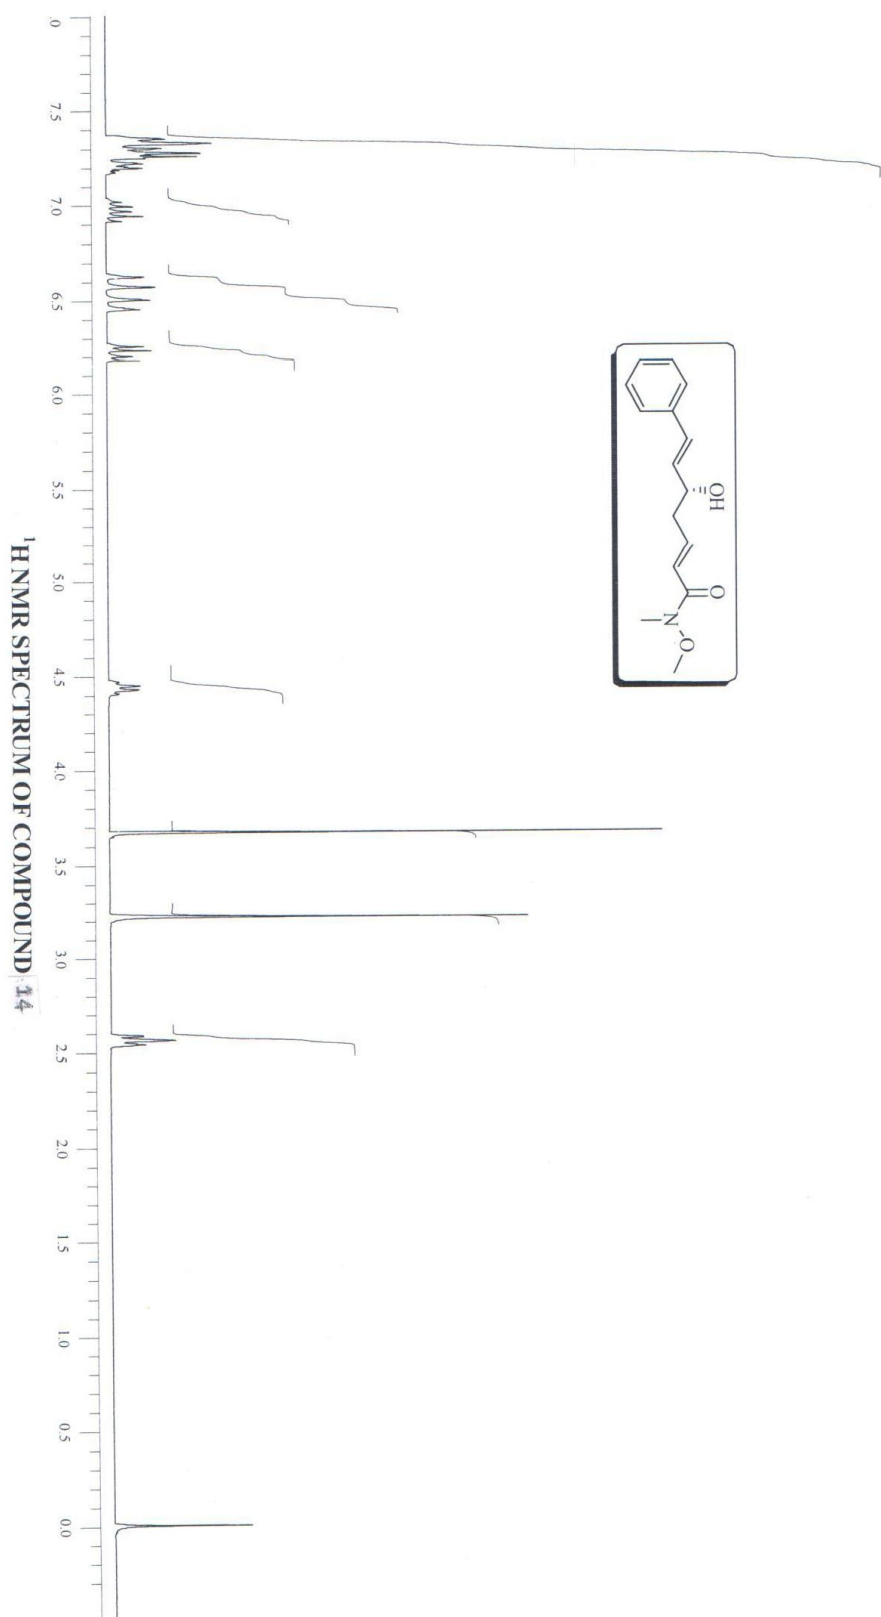

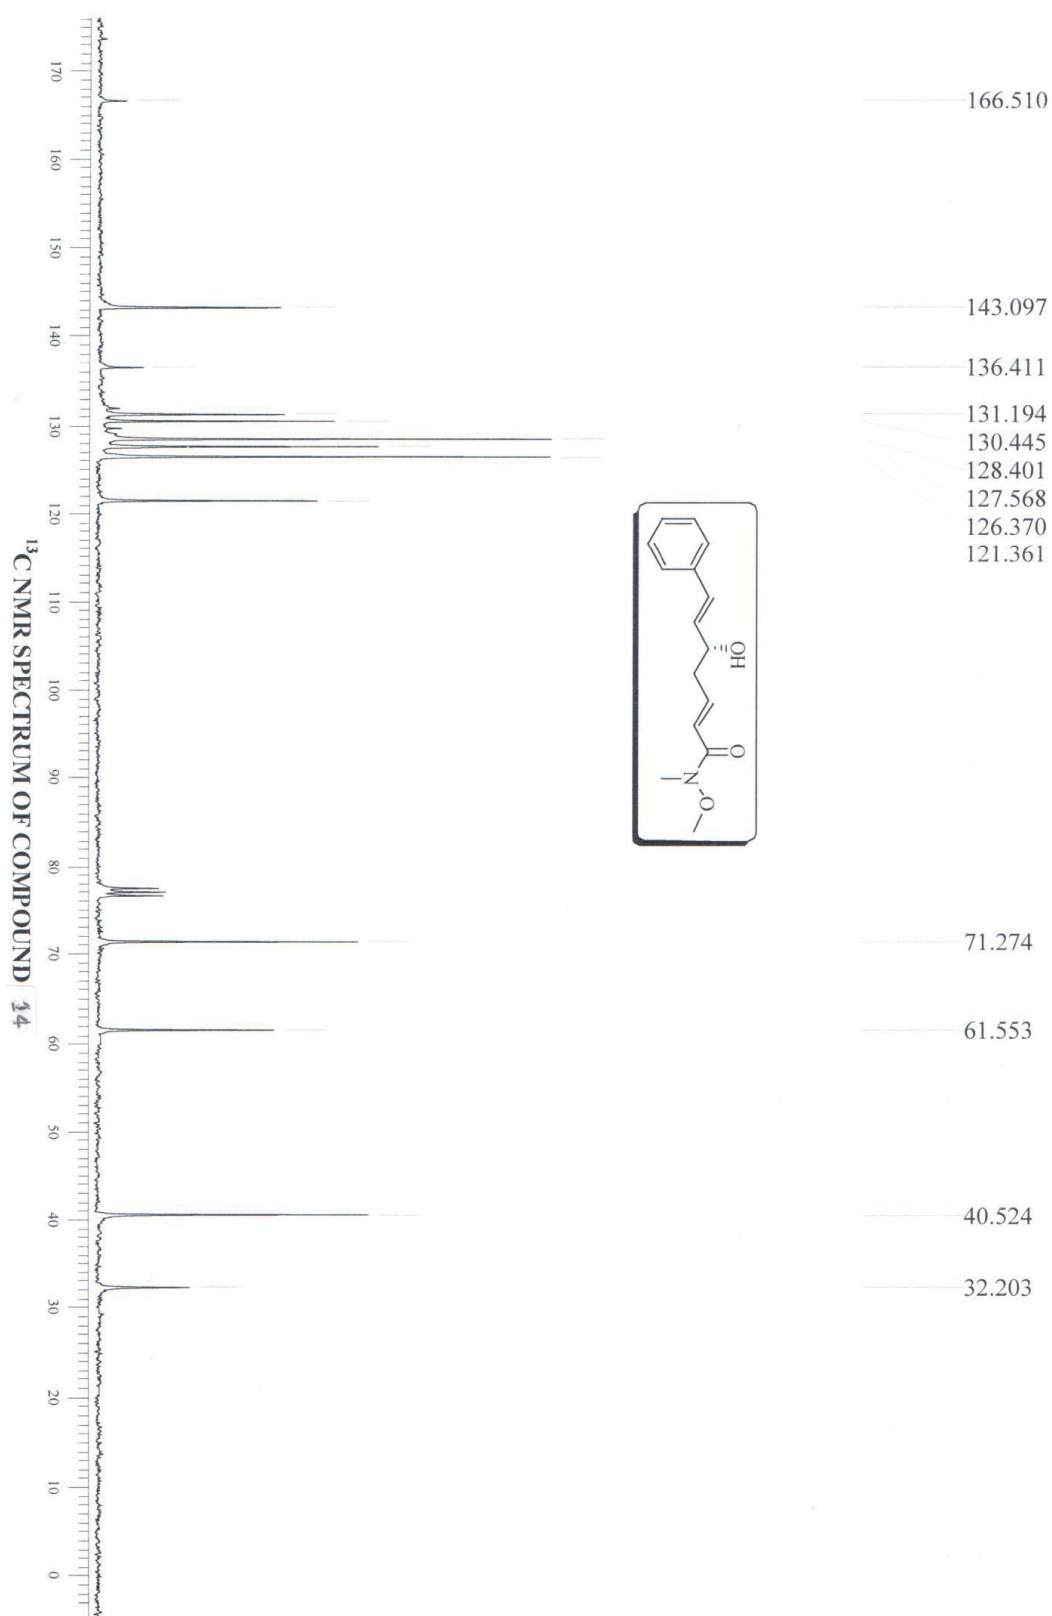

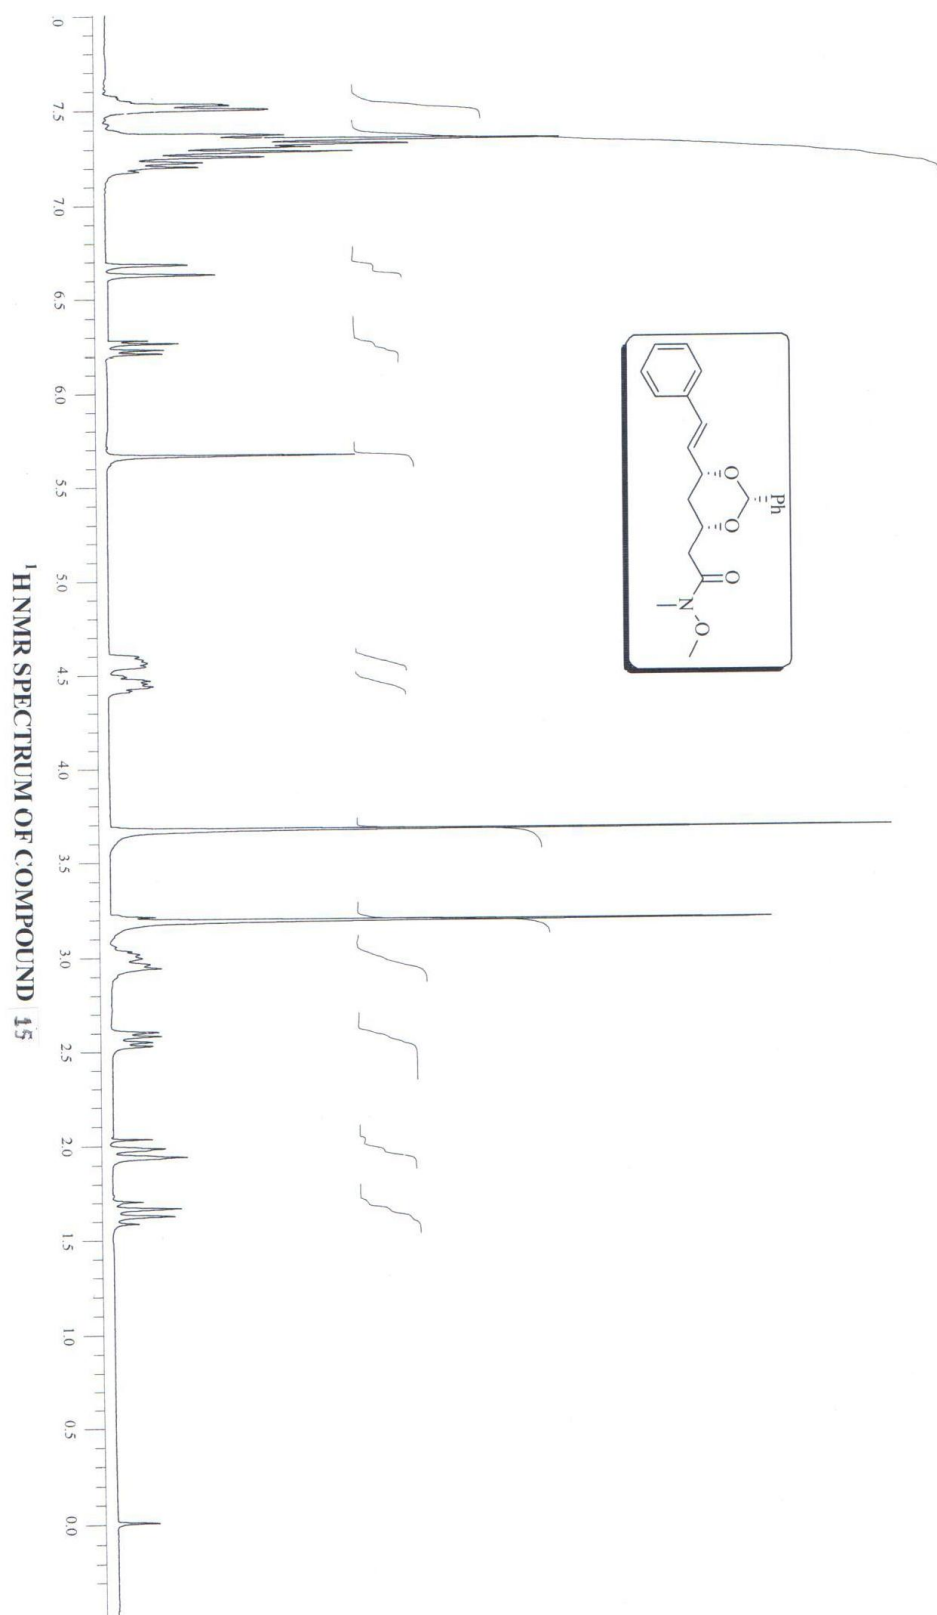

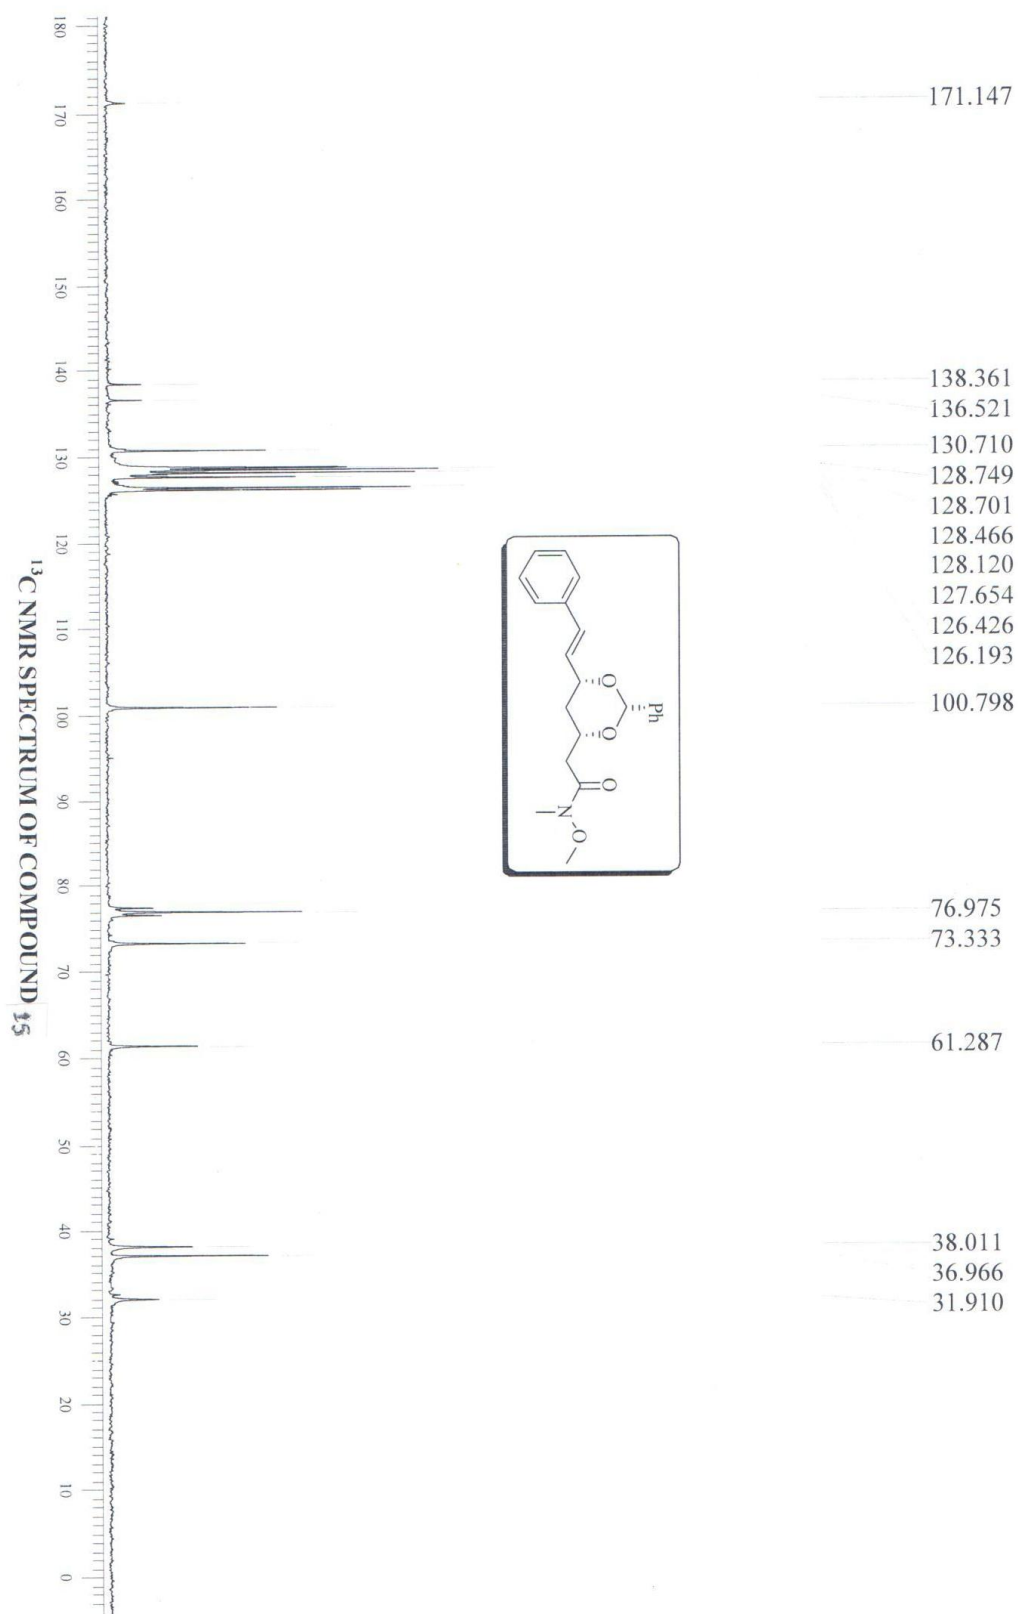

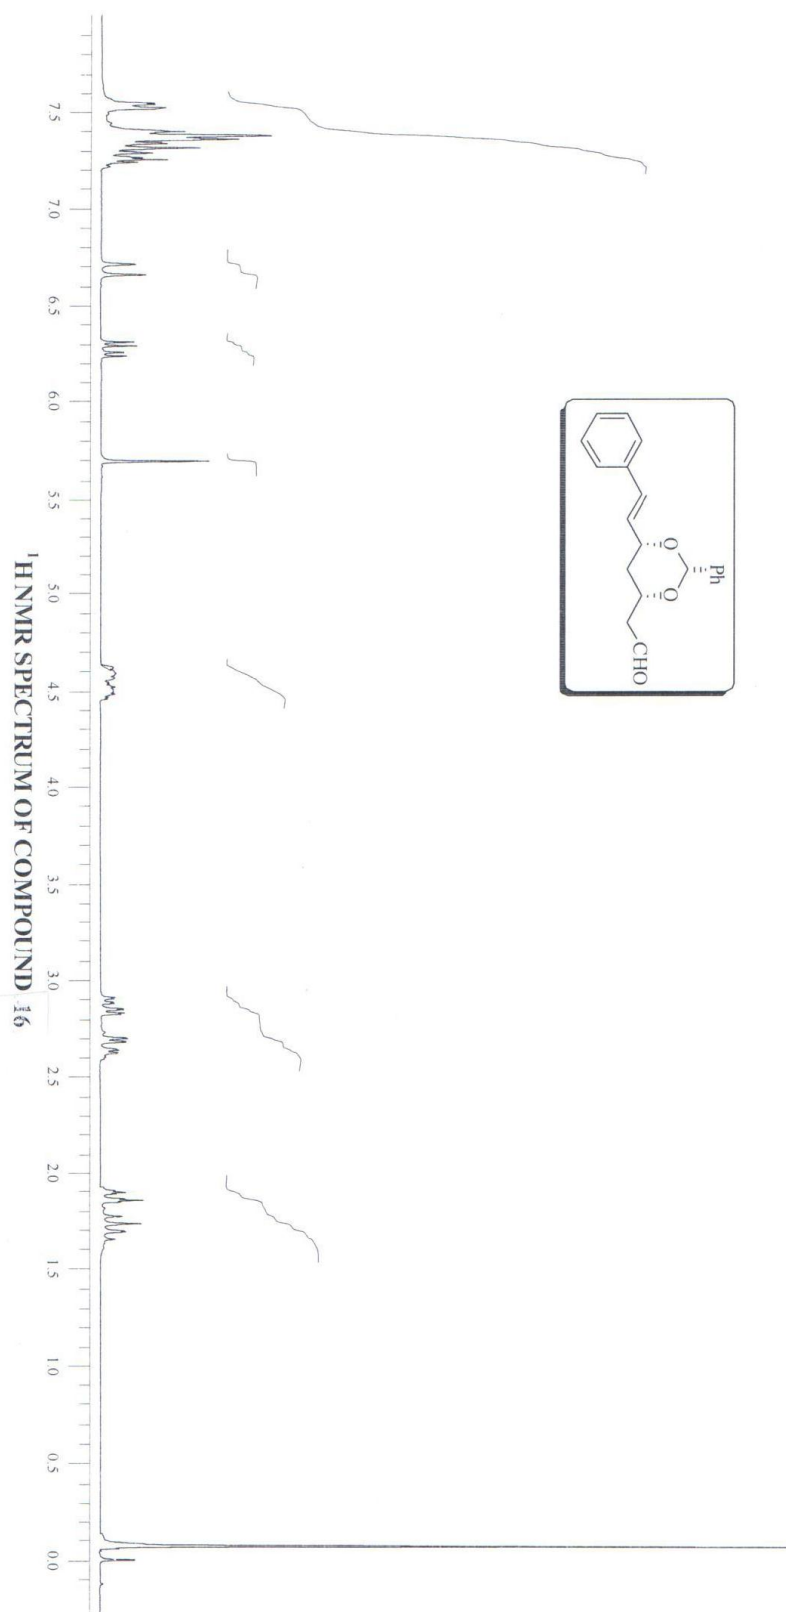

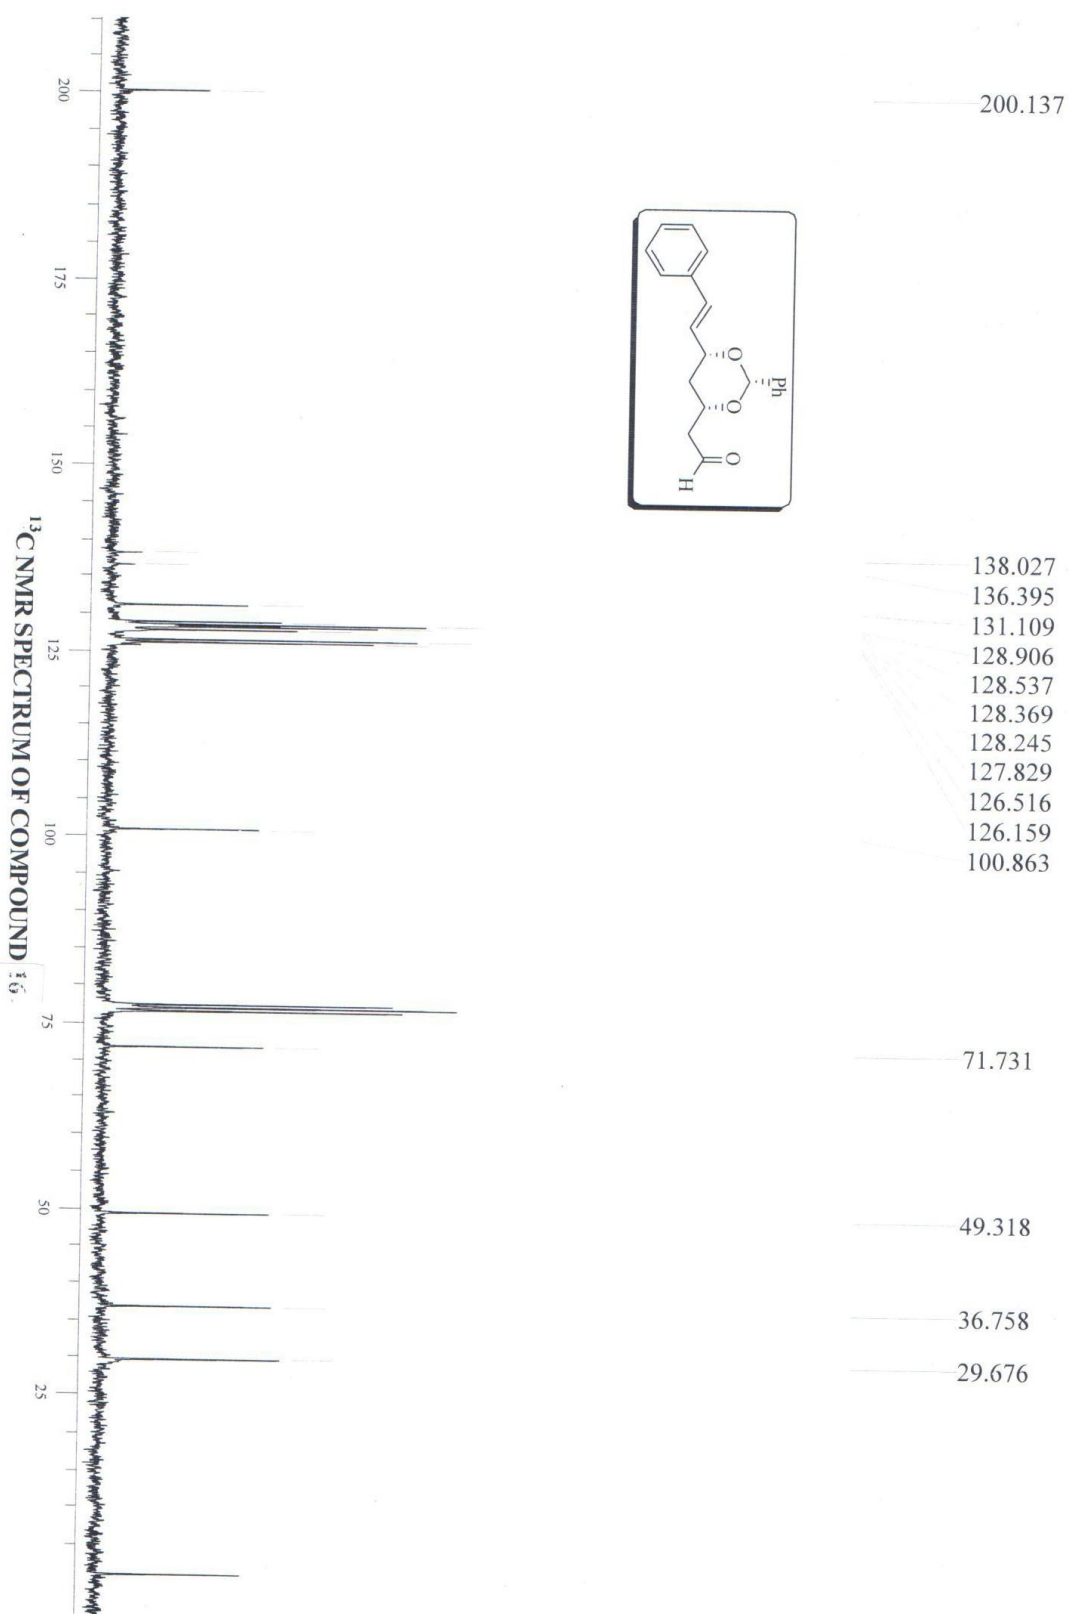

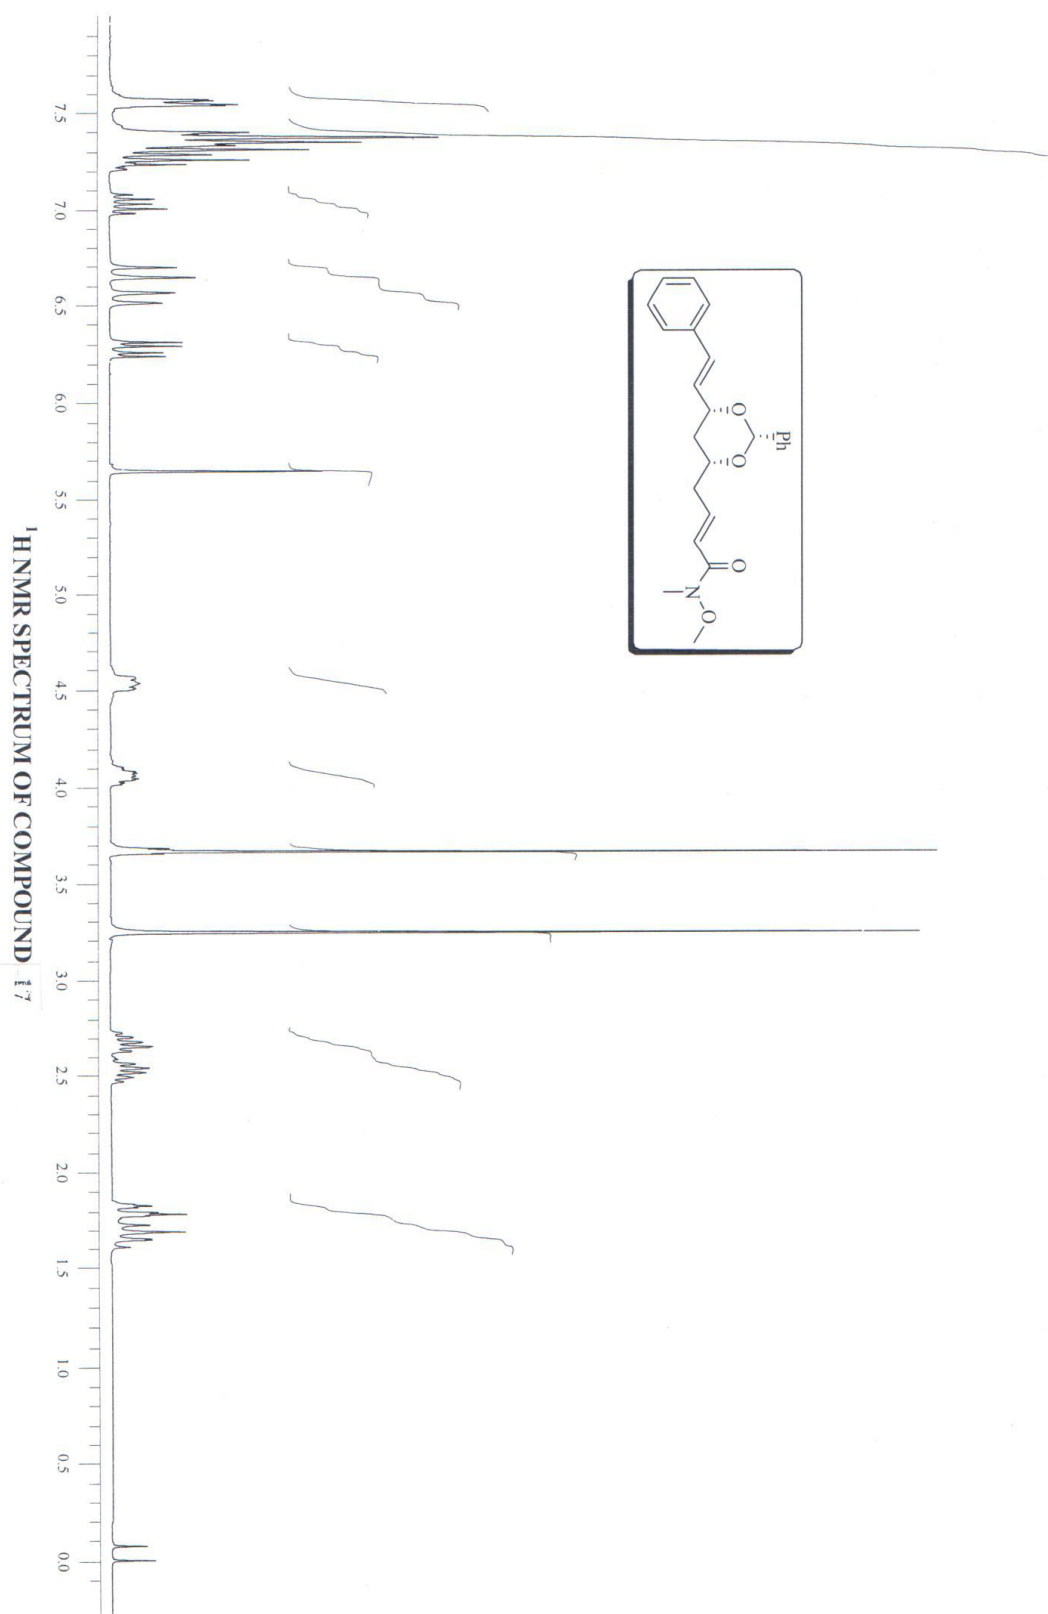

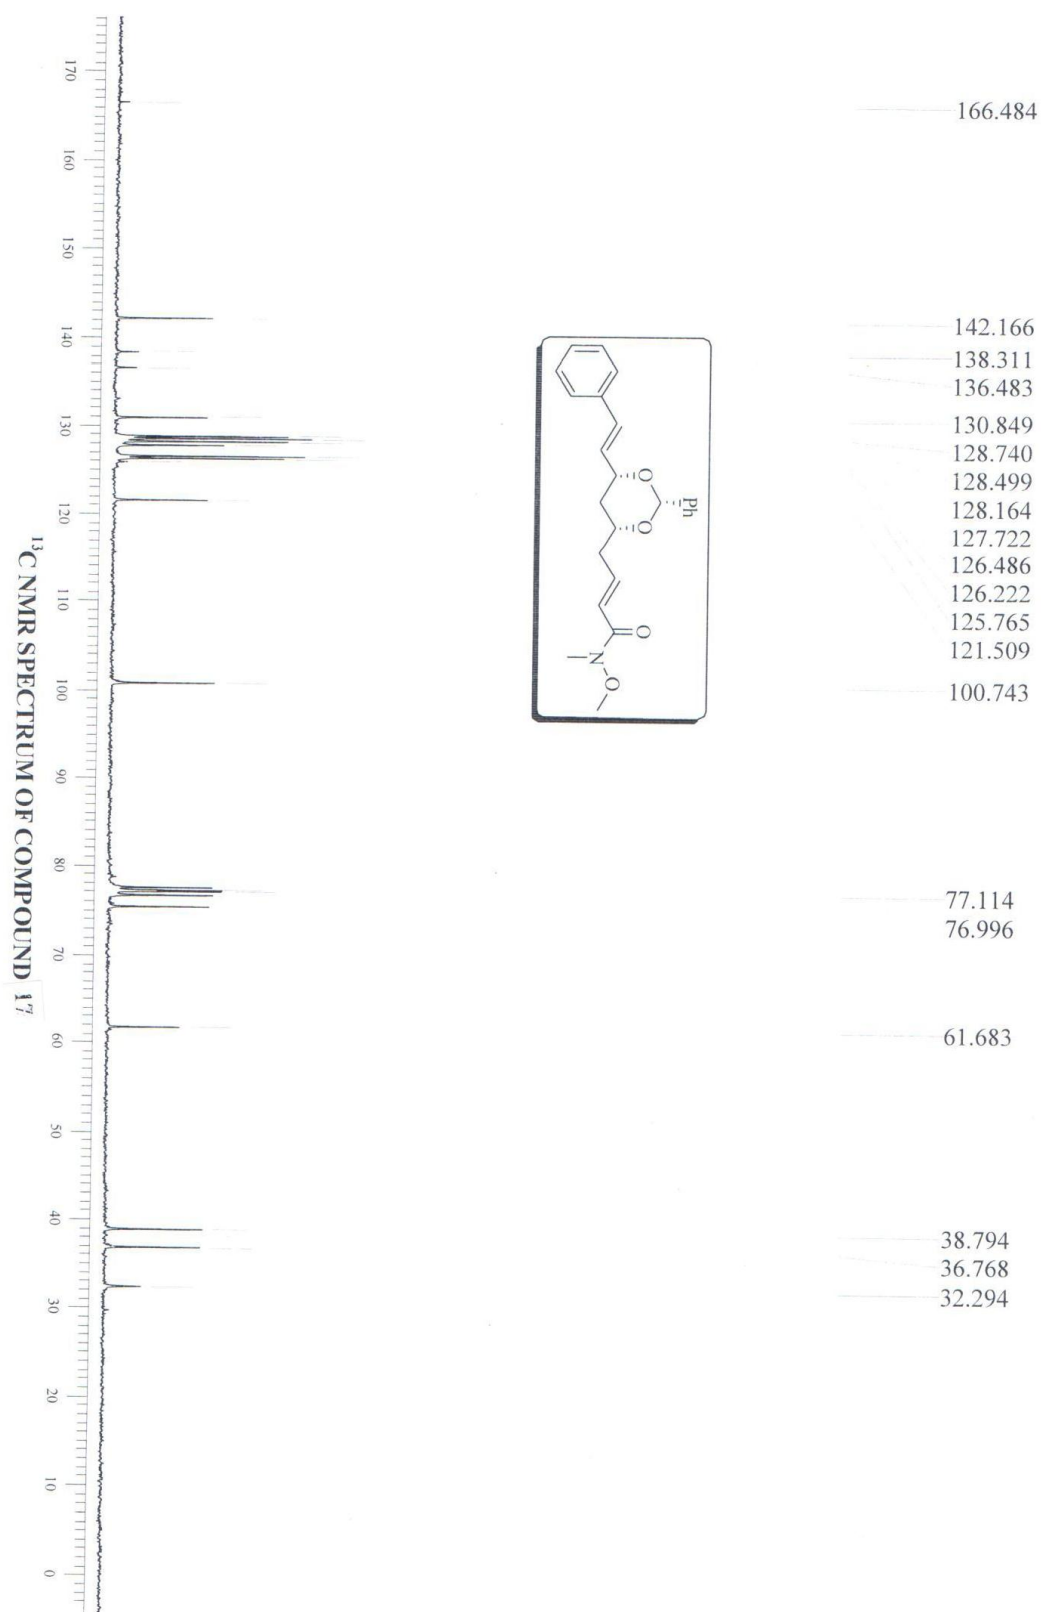

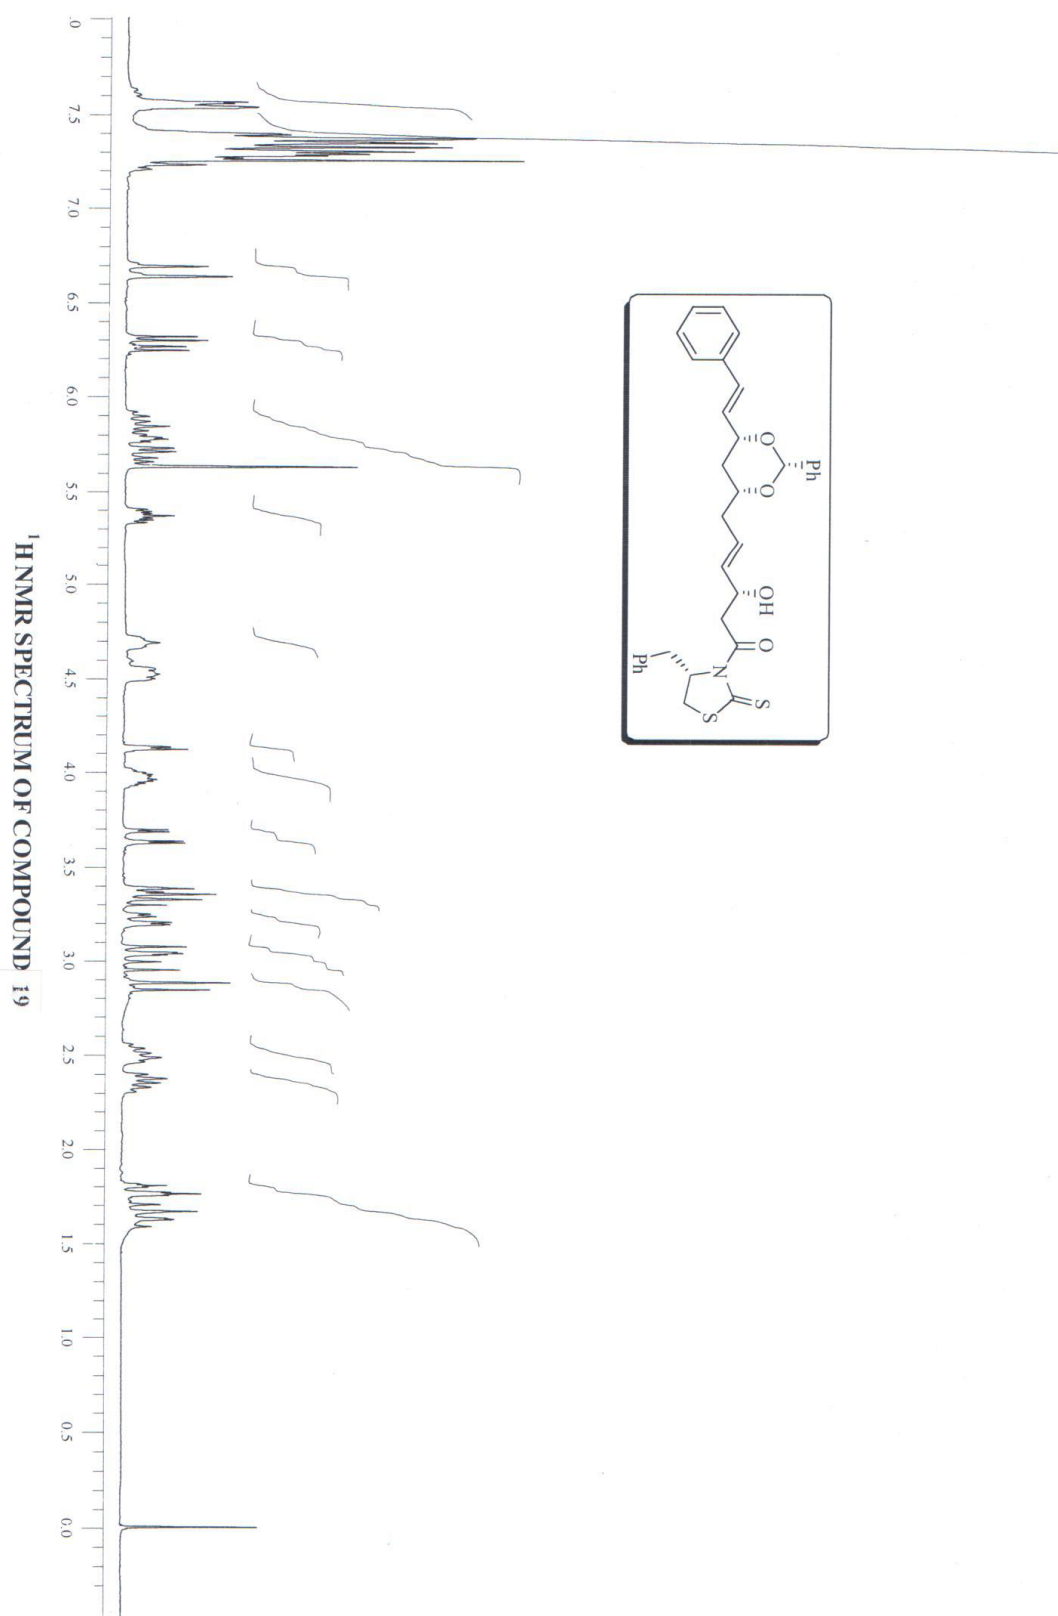

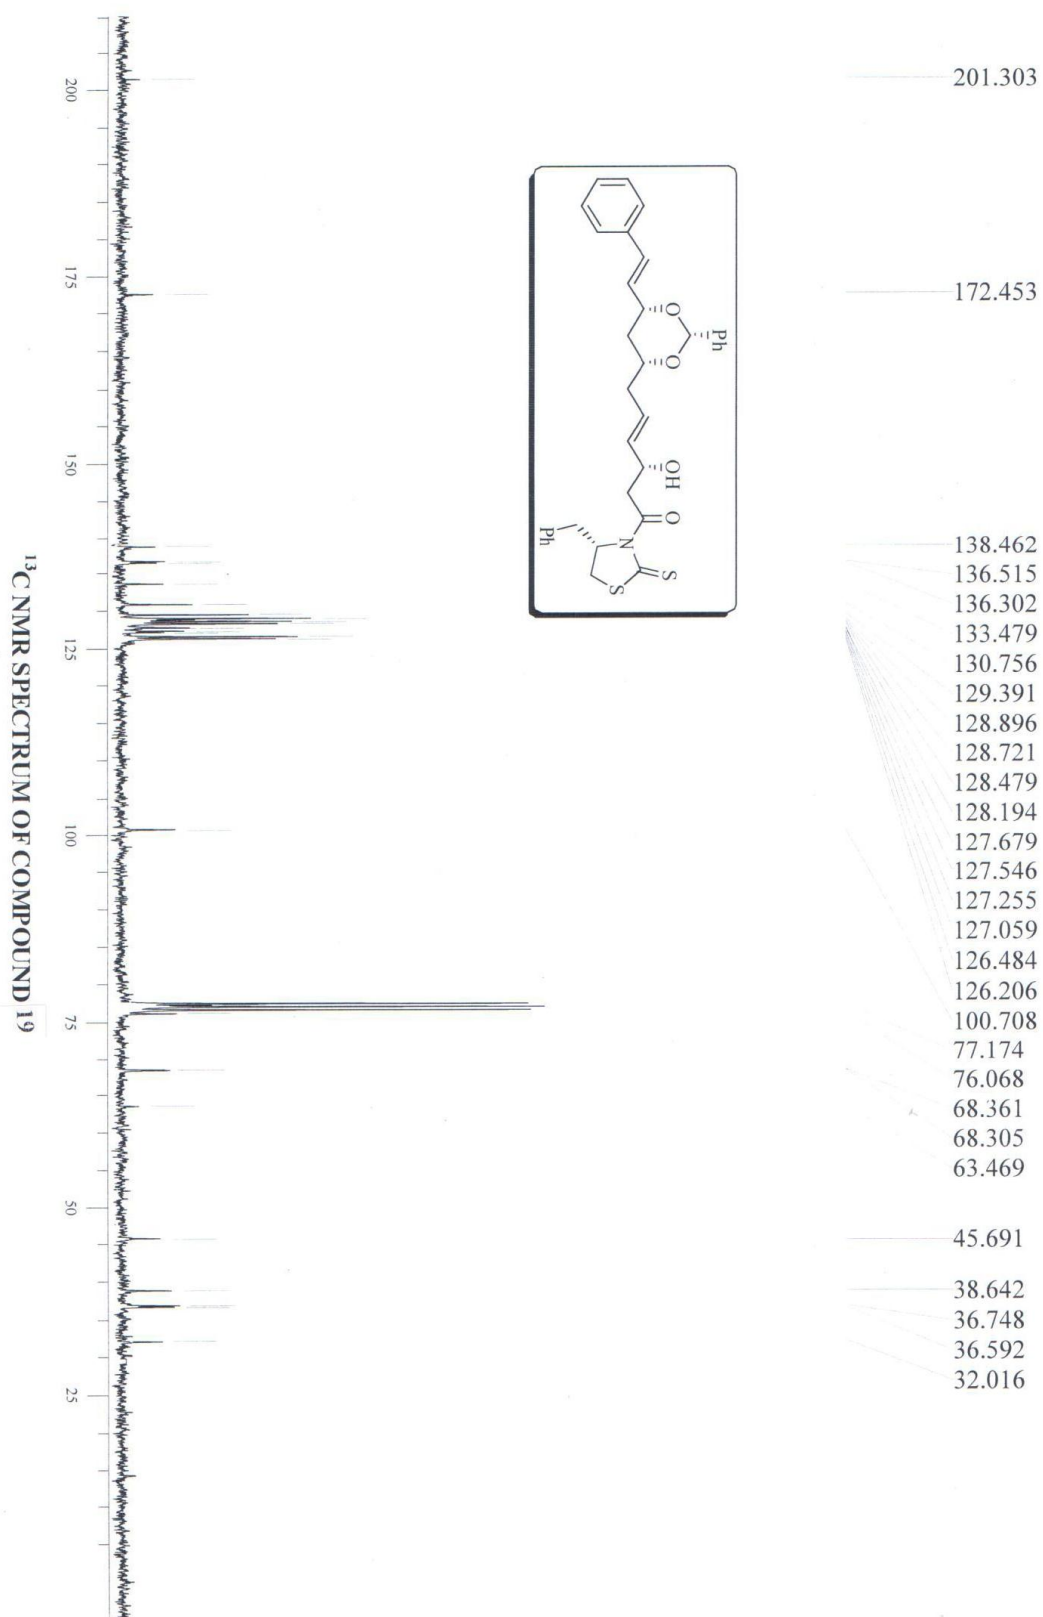

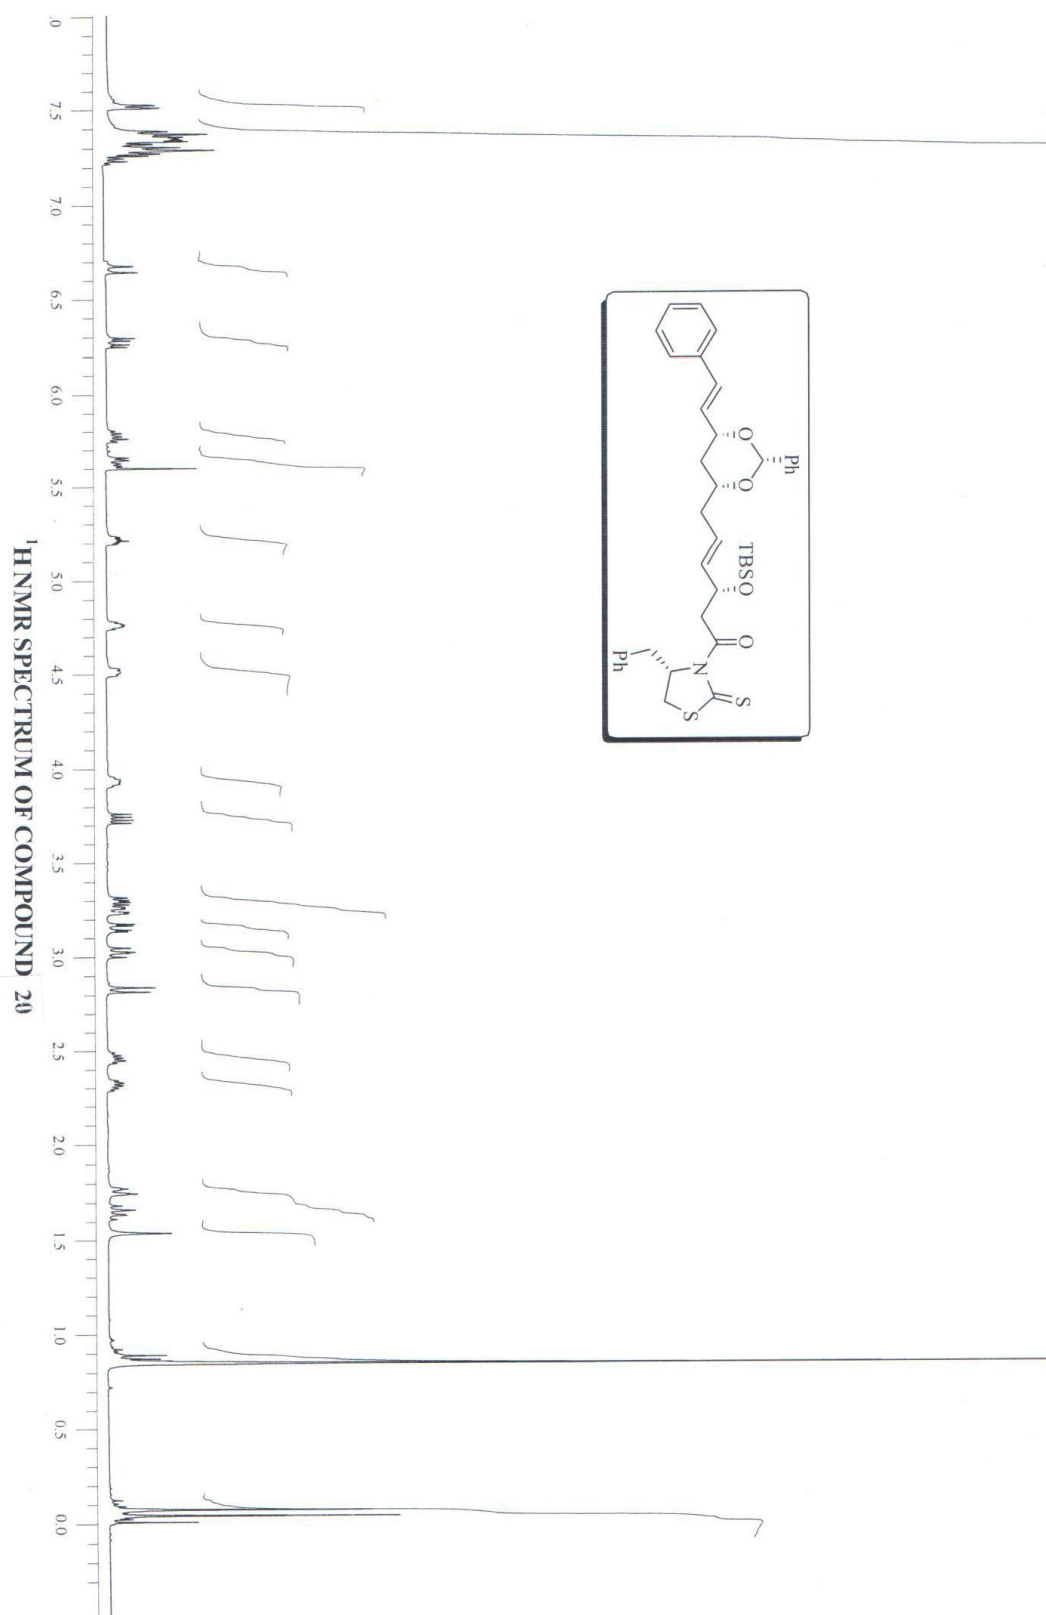

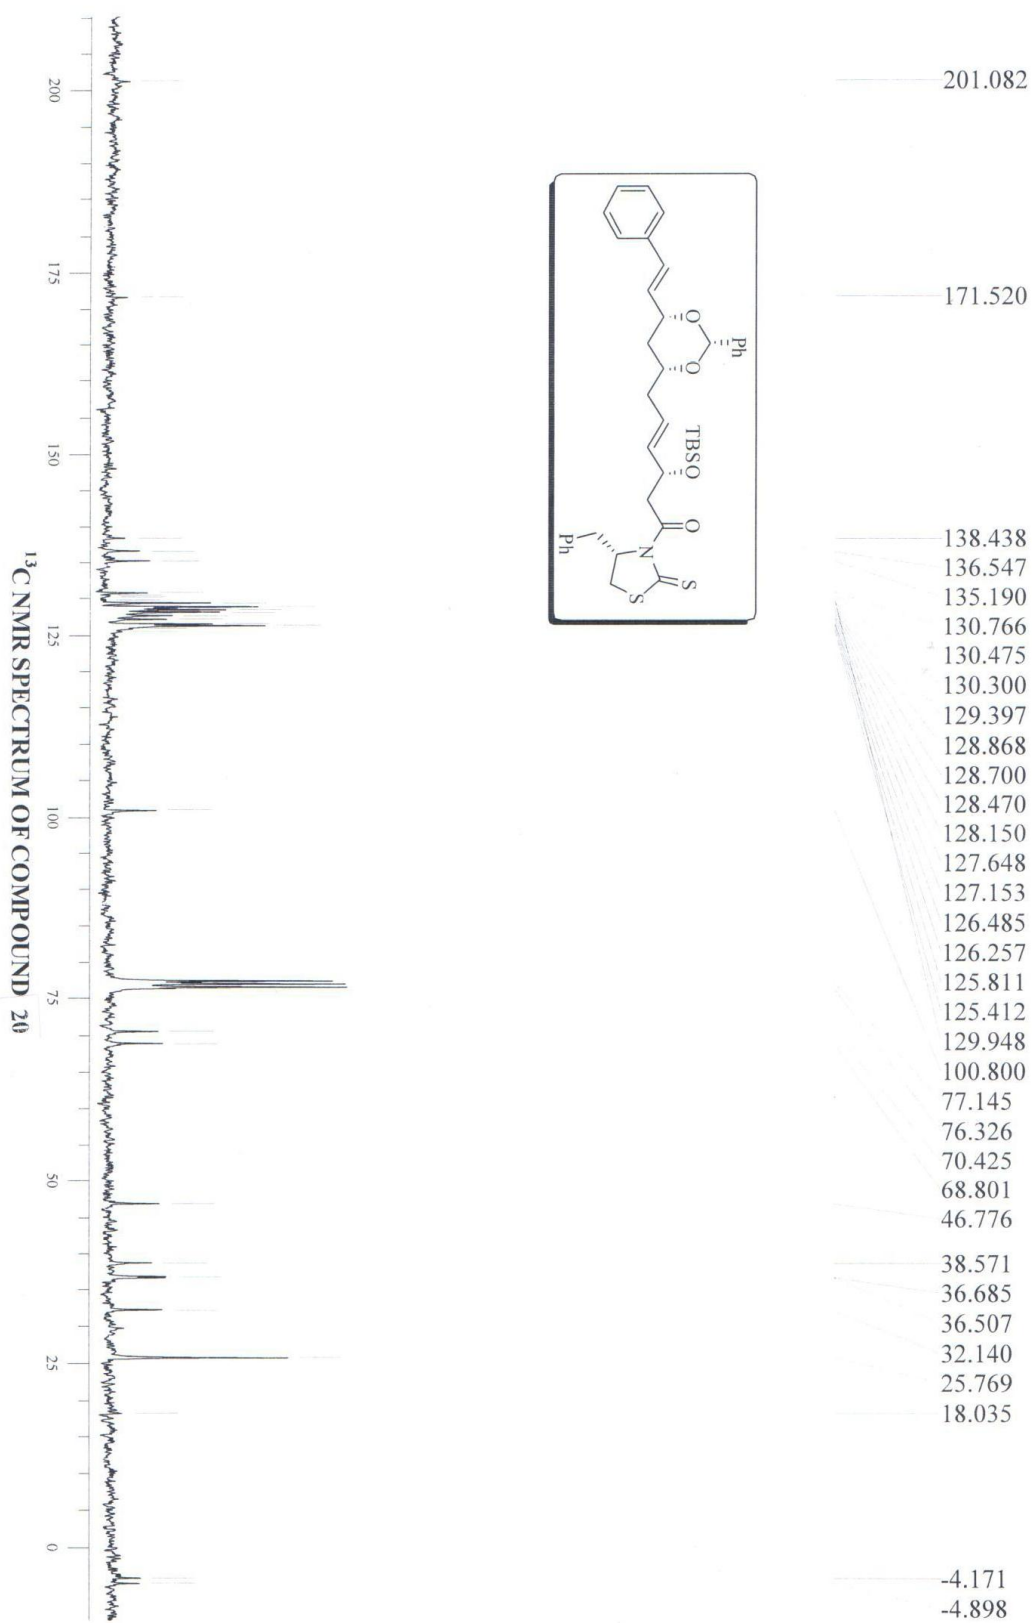

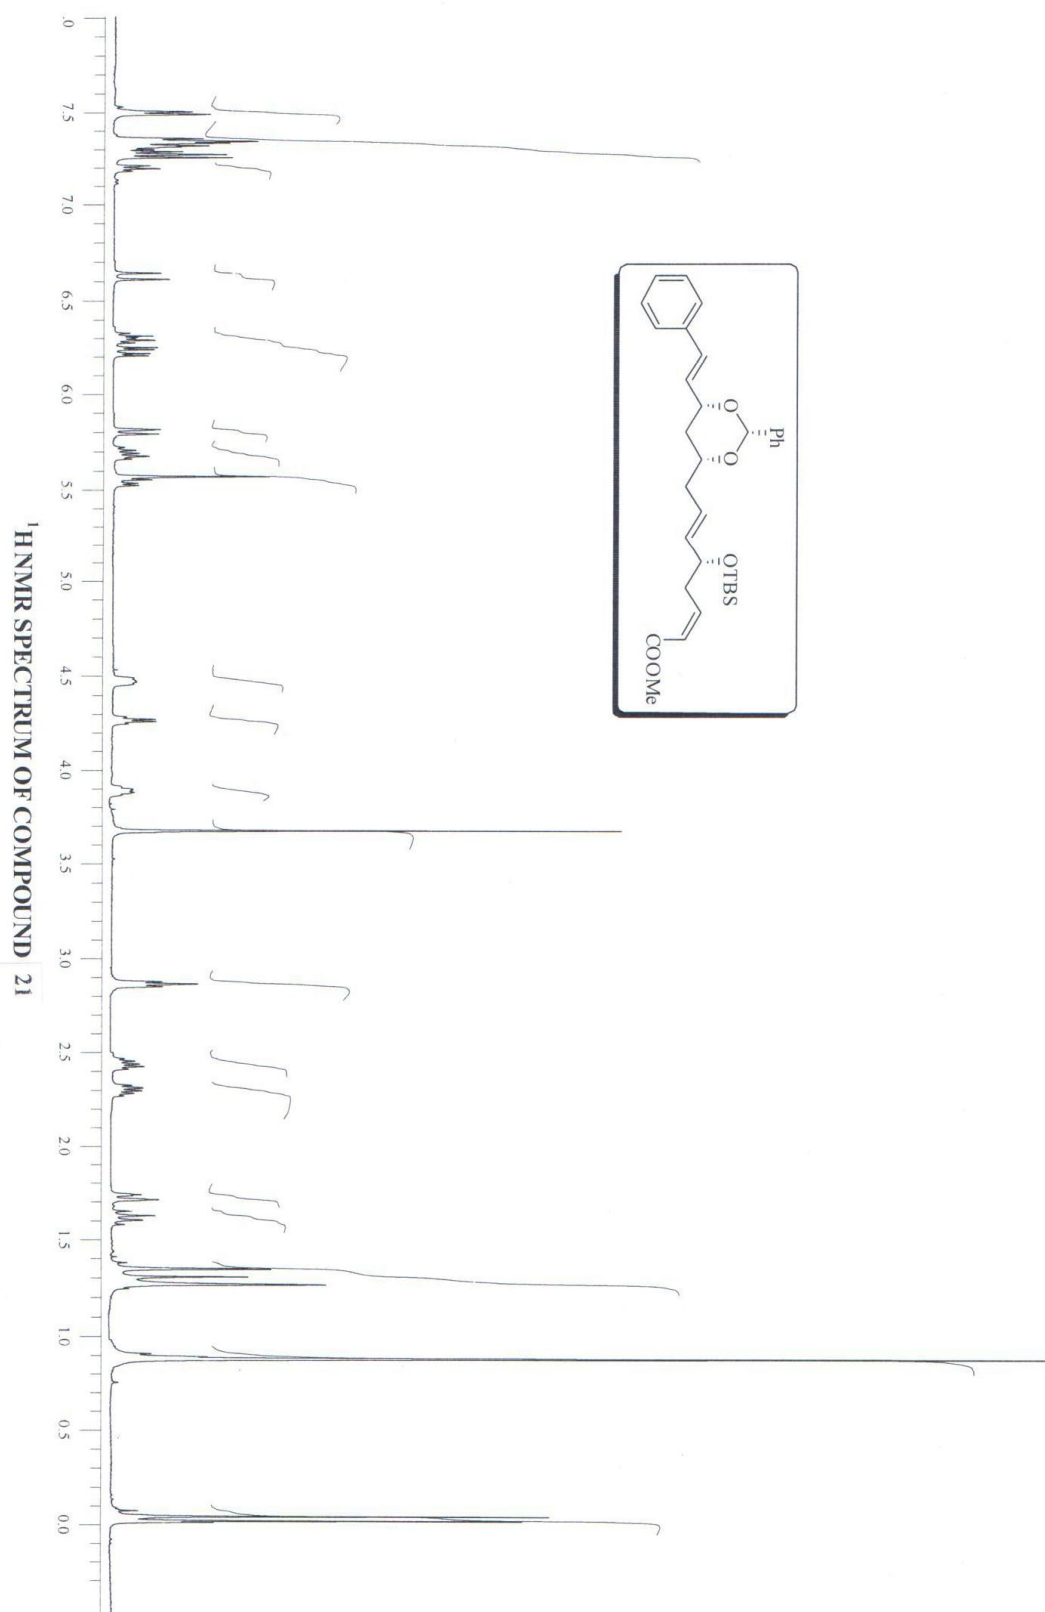

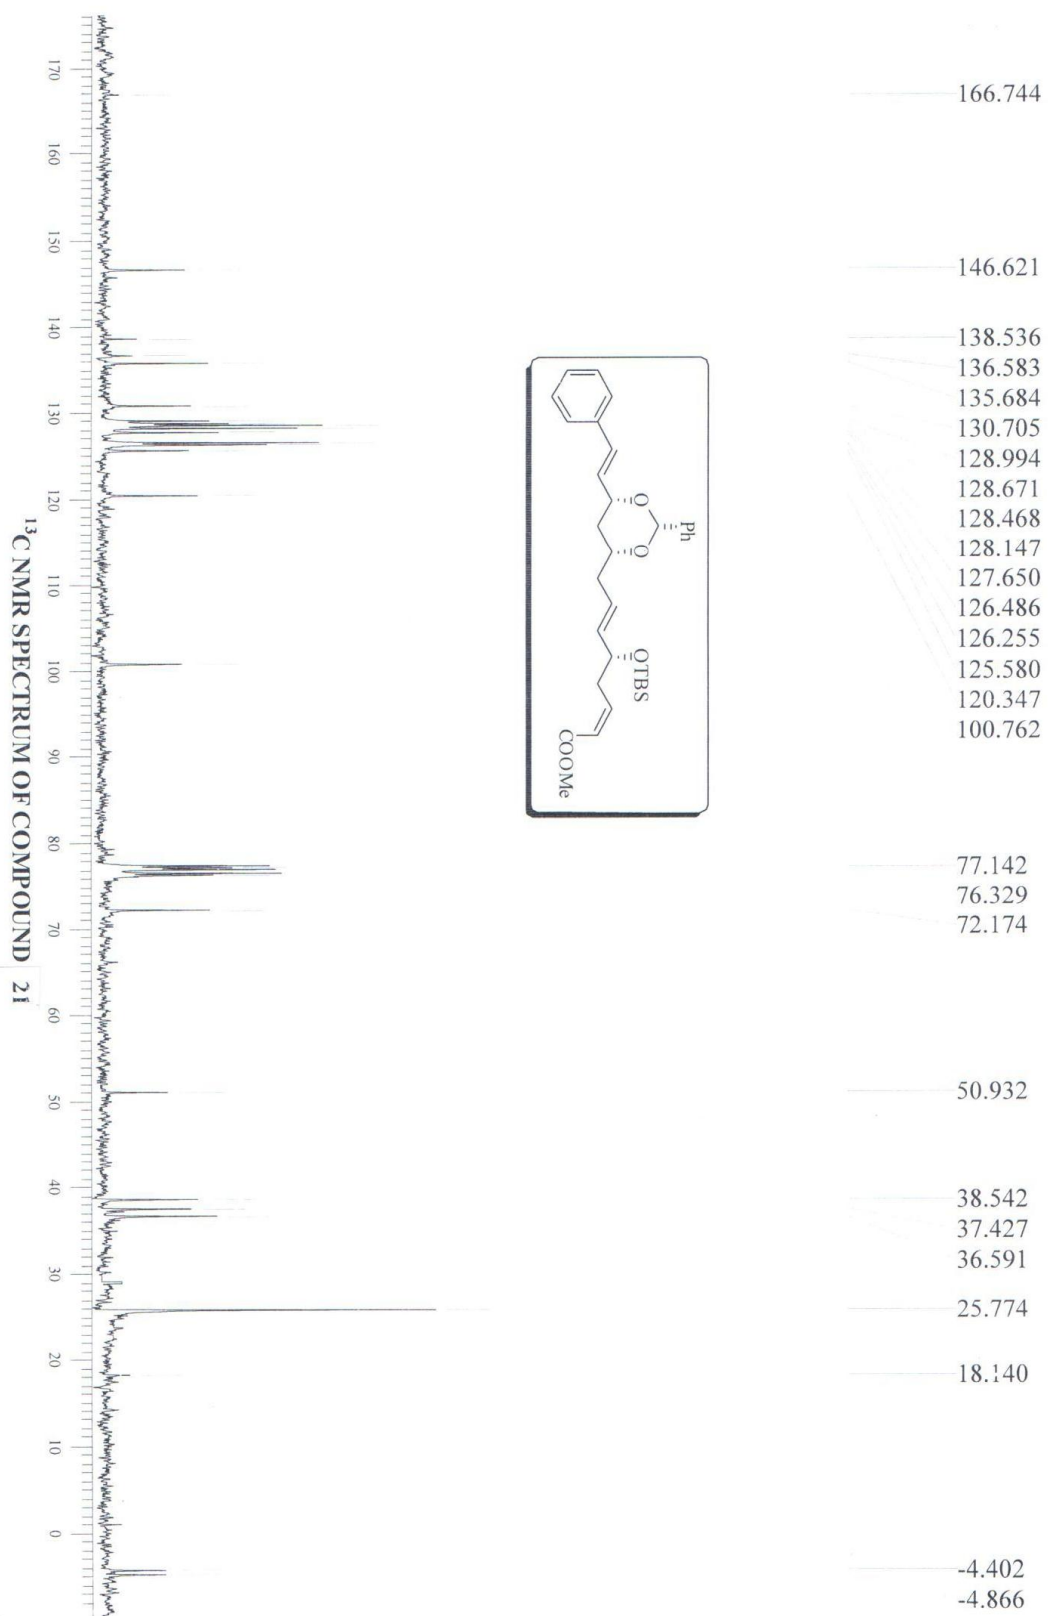

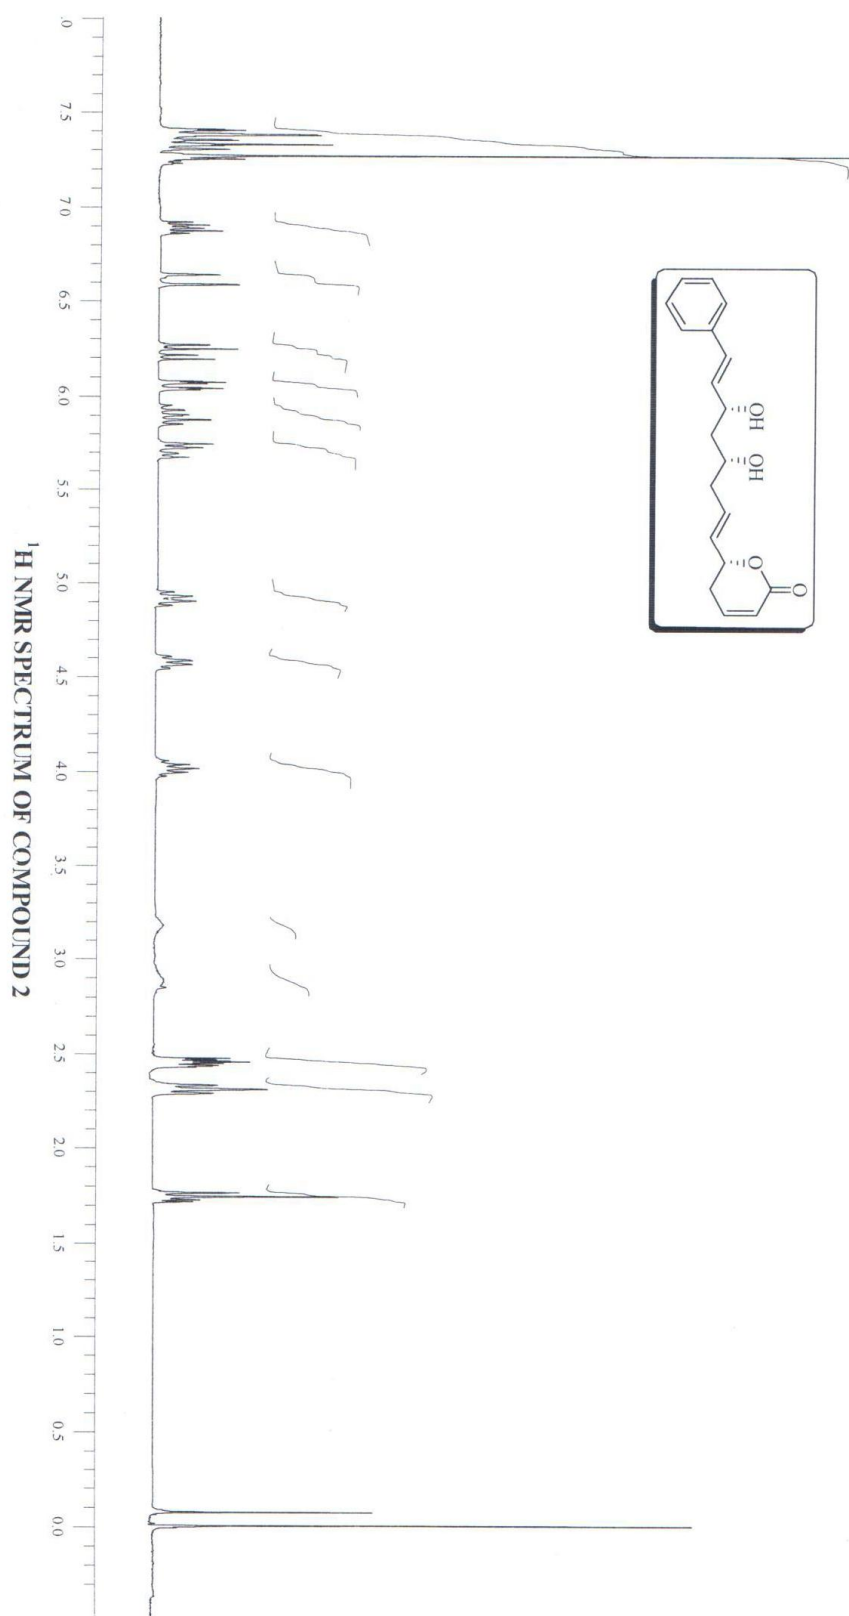

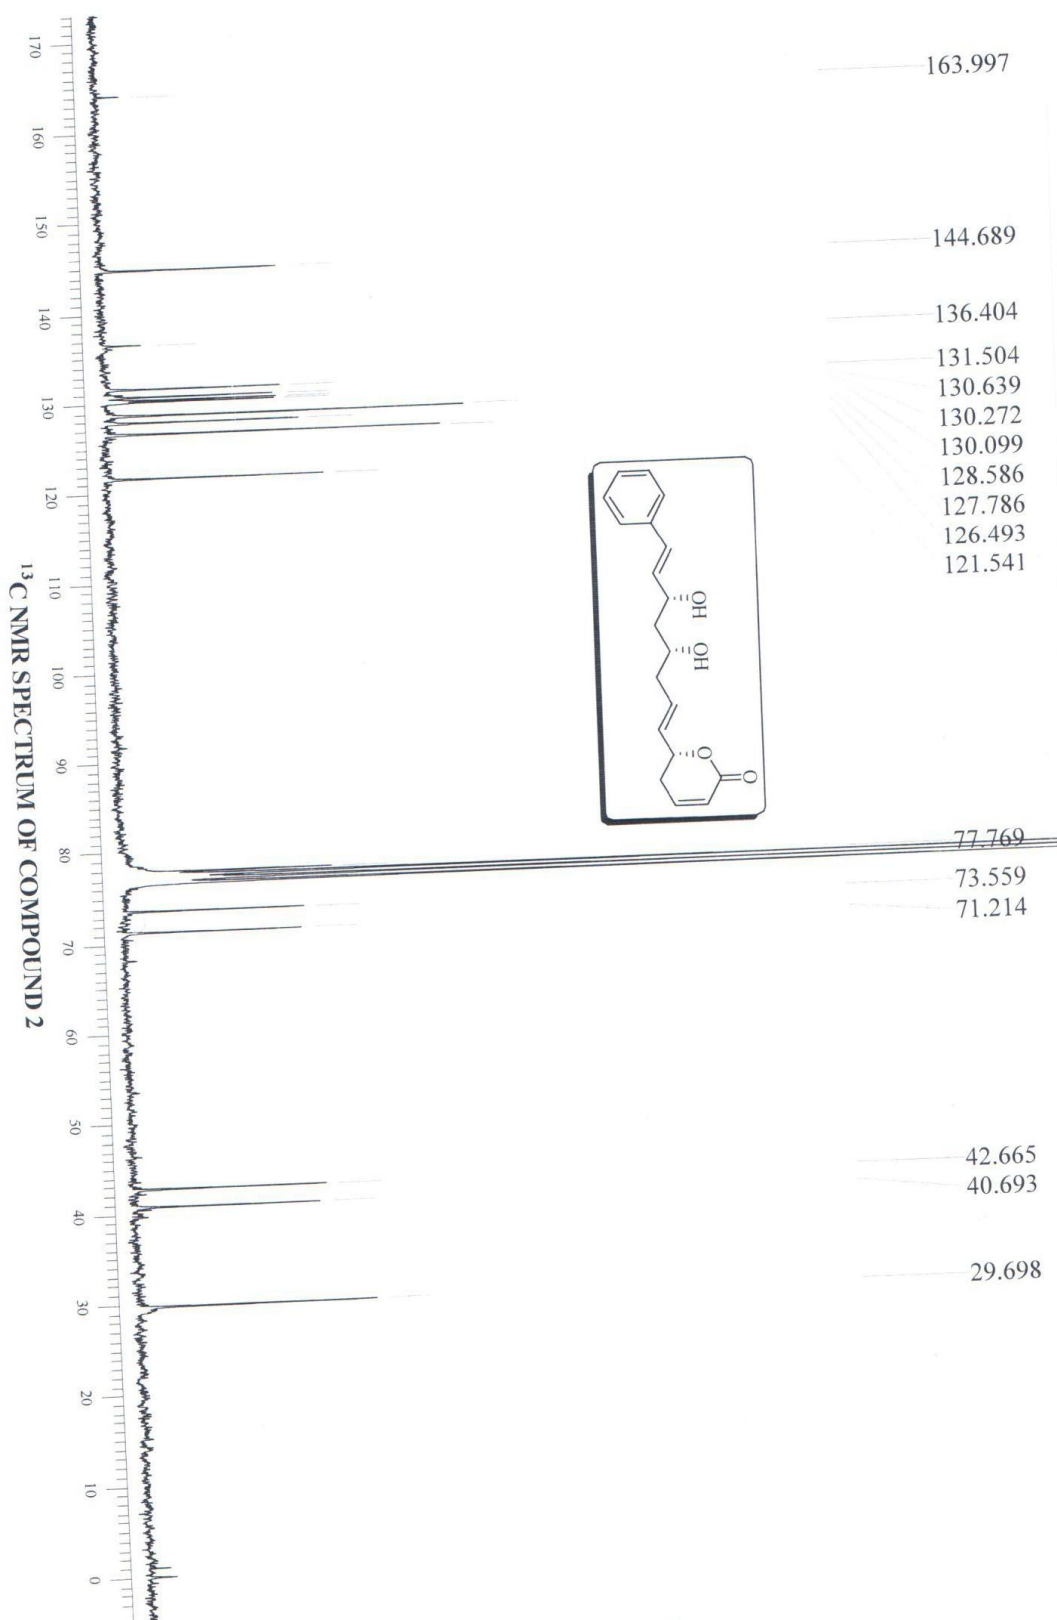

Supplement: c3ra23167d.pdf [file c3ra23167d.pdf]
